# Supplementary material for: Efficient updating of regional supply and use tables with the national-level statistics
Source: Springer Nature journal article supplement (doi:10.1186/s40008-022-00274-8), 2022-09-27
Supplement: MOESM1 [file 23546462]

## Sheet: W0
		1	2	3	4	5	6	7	8	9	10	11	12	13	14	15	16	17	18	19	20	21	22
		IND [Fish+Agr]	IND4	IND5	IND [man]	IND9	IND10	IND11	IND12	FD1	FD2	com1	com2	com3	com4	com5	com6	com7	com8	com9	com10	com11	com12		VA	1.76488e+07
1	com1	-35.4852	0	0	0	0	0	0	0	0	0	35.4852	0	0	0	0	0	0	0	0	0	0	0		EXP / available	#REF!
2	com2	-5250.47	0	0	0	0	0	0	0	0	0	0	5250.47	0	0	0	0	0	0	0	0	0	0		FDd+EXP-M	#REF!
3	com3	-1.13852e+06	0	0	-607.397	0	0	0	0	0	0	0	0	1139128	0	0	0	0	0	0	0	0	0
4	com4	0	-1.72447e+06	0	0	0	0	0	0	0	0	0	0	0	1724473	0	0	0	0	0	0	0	0		BALANCE	#REF!
5	com5	0	0	-737192	0	0	0	0	-67936.2	0	0	0	0	0	0	805129	0	0	0	0	0	0	0
6	com6	0	0	0	-14712	0	0	0	0	0	0	0	0	0	0	0	14712	0	0	0	0	0	0
7	com7	0	0	0	-892822	0	0	0	0	0	0	0	0	0	0	0	0	892822	0	0	0	0	0		E0
8	com8	-29473.4	0	0	-6.15496e+06	0	0	0	-166.082	0	0	0	0	0	0	0	0	0	6184599	0	0	0	0		#REF!	0
9	com9	0	0	0	0	-1.0402e+06	0	0	-28184.9	0	0	0	0	0	0	0	0	0	0	1068386	0	0	0		#REF!	-0.00032
10	com10	0	0	0	0	0	-1.57588e+06	0	0	0	0	0	0	0	0	0	0	0	0	0	1575883	0	0		#REF!	-22246.1	#REF!
11	com11	0	0	0	0	0	0	-1.42829e+06	-5988.96	0	0	0	0	0	0	0	0	0	0	0	0	1434278	0		#REF!	-42609.2	#REF!
12	com12	-1412.96	0	-2044.2	-51928.5	-1667.15	0	0	-1.69386e+07	0	0	0	0	0	0	0	0	0	0	0	0	0	16995647		#REF!	-665.696	#REF!
13	com1	0	0	0	35.4852	0	0	0	0	0	0	-35.4852	0	0	0	0	0	0	0	0	0	0	0		#REF!	-318889	#REF!
14	com2	0	0	0	5250.47	0	0	0	0	0	0	0	-5250.47	0	0	0	0	0	0	0	0	0	0		#REF!
15	com3	155390	15446.1	88287.6	683279	4646.84	175.606	963.388	10053.1	51048.8	107592	0	0	-1139128	0	0	0	0	0	0	0	0	0		#REF!
16	com4	17461.6	806.772	7675.85	38053.2	7705.91	4213.93	6315.78	169665	0	1.42997e+06	0	0	0	-1724473	0	0	0	0	0	0	0	0		#REF!	-128552	#REF!
17	com5	8908.52	6989.63	240513	107919	7953.71	11711.5	22166.5	125964	236011	36327.8	0	0	0	0	-805129	0	0	0	0	0	0	0		#REF!	-190326	#REF!
18	com6-8 (man)	121545	429598	22122.4	2.49302e+06	143135	40836	29982.1	615033	1.81398e+06	1.064e+06	0	0	0	0	0	-14712	-892822	-6184599	0	0	0	0		#REF!	-0.30501	#REF!
19	com9	20319.1	34417.8	18146.3	184598	112809	65027.1	62075.9	130702	240605	71132.6	0	0	0	0	0	0	0	0	-1068386	0	0	0		#REF!	-387674	#REF!
20	com10	23018.9	87033.8	3212.99	420491	26439.1	39807.5	17780.8	125153	460307	182313	0	0	0	0	0	0	0	0	0	-1575883	0	0
21	com11	837.001	220568	590.551	35294.8	10542.9	1354.8	8272.86	61850.8	1.01748e+06	77489.9	0	0	0	0	0	0	0	0	0	0	-1434278	0
22	com12	67349.3	141267	32731.6	657410	170279	350753	305900	4.0094e+06	7.3674e+06	3.50548e+06	0	0	0	0	0	0	0	0	0	0	0	-16995647
23	com1	0	0	0	0	0	0	0	0	0	0	0	0	0	0	0	0	0	0	0	0	0	0
24	com2	0	0	0	0	0	0	0	0	0	0	0	0	0	0	0	0	0	0	0	0	0	0
25	com3	36620	3819.68	22225.5	170740	1147.89	44.1898	239.883	2534.37	12793	26495.7	0	0	0	0	0	0	0	0	0	0	0	0
26	com4	0	0	0	0	0	0	0	0	0	0	0	0	0	0	0	0	0	0	0	0	0	0
27	com5	22.6759	19.8452	583.364	291.183	22.7859	34.8158	64.0353	377.994	687.587	108.022	0	0	0	0	0	0	0	0	0	0	0	0
28	com6-8 (man)	11246.3	57993.9	2877.66	304091	19223.1	5517.02	4075.05	76815.9	196383	145569	0	0	0	0	0	0	0	0	0	0	0	0
29	com9	472.298	865.573	477.082	4564.52	2863.07	1674.34	1571.87	3394.26	6199.98	1833.7	0	0	0	0	0	0	0	0	0	0	0	0
30	com10	0	0	0	0	0	0	0	0	0	0	0	0	0	0	0	0	0	0	0	0	0	0
31	com11	0	0	0	0	0	0	0	0	0	0	0	0	0	0	0	0	0	0	0	0	0	0
32	com12	4525.92	9135.77	2072.47	42181.6	11020.8	22410.7	19706.9	255721	471953	223370	0	0	0	0	0	0	0	0	0	0	0	0
33	LAB r1-FISH+AGR	3198.36	0	0	0	0	0	0	0	0	0	0	0	0	0	0	0	0	0	0	0	0	0
34	r1-ind4	0	1502.88	0	0	0	0	0	0	0	0	0	0	0	0	0	0	0	0	0	0	0	0
35	r1-ind5	0	0	309.254	0	0	0	0	0	0	0	0	0	0	0	0	0	0	0	0	0	0	0
36	r1-MANU (6-8)	0	0	0	1000.53	0	0	0	0	0	0	0	0	0	0	0	0	0	0	0	0	0	0
37	r1-ind9	0	0	0	0	1620.01	0	0	0	0	0	0	0	0	0	0	0	0	0	0	0	0	0
38	r1-ind10	0	0	0	0	0	453.168	0	0	0	0	0	0	0	0	0	0	0	0	0	0	0	0
39	r1-ind11	0	0	0	0	0	0	1372.4	0	0	0	0	0	0	0	0	0	0	0	0	0	0	0
40	r1-ind12	0	0	0	0	0	0	0	19559.6	0	0	0	0	0	0	0	0	0	0	0	0	0	0
41	LAB r2-FISH+AGR	26047.1	0	0	0	0	0	0	0	0	0	0	0	0	0	0	0	0	0	0	0	0	0
42	r2-ind4	0	56247.4	0	0	0	0	0	0	0	0	0	0	0	0	0	0	0	0	0	0	0	0
43	r2-ind5	0	0	14107.3	0	0	0	0	0	0	0	0	0	0	0	0	0	0	0	0	0	0	0
44	r2-MANU (6-8)	0	0	0	167170	0	0	0	0	0	0	0	0	0	0	0	0	0	0	0	0	0	0
45	r2-ind9	0	0	0	0	40373.4	0	0	0	0	0	0	0	0	0	0	0	0	0	0	0	0	0
46	r2-ind10	0	0	0	0	0	79378.7	0	0	0	0	0	0	0	0	0	0	0	0	0	0	0	0
47	r2-ind11	0	0	0	0	0	0	84260.8	0	0	0	0	0	0	0	0	0	0	0	0	0	0	0
48	r2-ind12	0	0	0	0	0	0	0	1.20061e+06	0	0	0	0	0	0	0	0	0	0	0	0	0	0
49	LAB r3-FISH+AGR	124953	0	0	0	0	0	0	0	0	0	0	0	0	0	0	0	0	0	0	0	0	0
50	r3-ind4	0	306387	0	0	0	0	0	0	0	0	0	0	0	0	0	0	0	0	0	0	0	0
51	r3-ind5	0	0	73106.9	0	0	0	0	0	0	0	0	0	0	0	0	0	0	0	0	0	0	0
52	r3-MANU (6-8)	0	0	0	803328	0	0	0	0	0	0	0	0	0	0	0	0	0	0	0	0	0	0
53	r3-ind9	0	0	0	0	260614	0	0	0	0	0	0	0	0	0	0	0	0	0	0	0	0	0
54	r3-ind10	0	0	0	0	0	419654	0	0	0	0	0	0	0	0	0	0	0	0	0	0	0	0
55	r3-ind11	0	0	0	0	0	0	431491	0	0	0	0	0	0	0	0	0	0	0	0	0	0	0
56	r3-ind12	0	0	0	0	0	0	0	5.74111e+06	0	0	0	0	0	0	0	0	0	0	0	0	0	0
57	CAP r1-FISH+AGR	13978.1	0	0	0	0	0	0	0	0	0	0	0	0	0	0	0	0	0	0	0	0	0
58	r1-ind4	0	1346.86	0	0	0	0	0	0	0	0	0	0	0	0	0	0	0	0	0	0	0	0
59	r1-ind5	0	0	572.448	0	0	0	0	0	0	0	0	0	0	0	0	0	0	0	0	0	0	0
60	r1-MANU (6-8)	0	0	0	943.309	0	0	0	0	0	0	0	0	0	0	0	0	0	0	0	0	0	0
61	r1-ind9	0	0	0	0	4374.22	0	0	0	0	0	0	0	0	0	0	0	0	0	0	0	0	0
62	r1-ind10	0	0	0	0	0	760.646	0	0	0	0	0	0	0	0	0	0	0	0	0	0	0	0
63	r1-ind11	0	0	0	0	0	0	792.952	0	0	0	0	0	0	0	0	0	0	0	0	0	0	0
64	r1-ind12	0	0	0	0	0	0	0	9725.84	0	0	0	0	0	0	0	0	0	0	0	0	0	0
65	CAP r2-FISH+AGR	64364.6	0	0	0	0	0	0	0	0	0	0	0	0	0	0	0	0	0	0	0	0	0
66	r2-ind4	0	50695.7	0	0	0	0	0	0	0	0	0	0	0	0	0	0	0	0	0	0	0	0
67	r2-ind5	0	0	26479.9	0	0	0	0	0	0	0	0	0	0	0	0	0	0	0	0	0	0	0
68	r2-MANU (6-8)	0	0	0	174045	0	0	0	0	0	0	0	0	0	0	0	0	0	0	0	0	0	0
69	r2-ind9	0	0	0	0	32681.6	0	0	0	0	0	0	0	0	0	0	0	0	0	0	0	0	0
70	r2-ind10	0	0	0	0	0	92634.6	0	0	0	0	0	0	0	0	0	0	0	0	0	0	0	0
71	r2-ind11	0	0	0	0	0	0	80154	0	0	0	0	0	0	0	0	0	0	0	0	0	0	0
72	r2-ind12	0	0	0	0	0	0	0	823555	0	0	0	0	0	0	0	0	0	0	0	0	0	0
73	CAP r3-FISH+AGR	474436	0	0	0	0	0	0	0	0	0	0	0	0	0	0	0	0	0	0	0	0	0
74	r3-ind4	0	300330	0	0	0	0	0	0	0	0	0	0	0	0	0	0	0	0	0	0	0	0
75	r3-ind5	0	0	183145	0	0	0	0	0	0	0	0	0	0	0	0	0	0	0	0	0	0	0
76	r3-MANU (6-8)	0	0	0	821328	0	0	0	0	0	0	0	0	0	0	0	0	0	0	0	0	0	0
77	r3-ind9	0	0	0	0	184415	0	0	0	0	0	0	0	0	0	0	0	0	0	0	0	0	0
78	r3-ind10	0	0	0	0	0	439441	0	0	0	0	0	0	0	0	0	0	0	0	0	0	0	0
79	r3-ind11	0	0	0	0	0	0	351103	0	0	0	0	0	0	0	0	0	0	0	0	0	0	0
80	r3-ind12	0	0	0	0	0	0	0	3.65964e+06	0	0	0	0	0	0	0	0	0	0	0	0	0	0
	SUM	-0.0009	0.027	-0.0068	-0.05517	0.01387	0.02249	-0.01962	0.0247	1.18748e+07	6.87168e+06	0	0	0	0	0	0	0	0	0	0	0	0	#REF!

## Sheet: Cover
	Additional material
	Efficient updating of regional supply and use tables with the national-level statistics
	By: Barbara Hutnicak, International Pacific Halibut Commission

## Sheet: S1
	Additional material S1
	Aligning trade vectors
	To align the model with BEA SUTs, the following modifications were applied to trade vectors:
	1. As BEA tables suggest no import of construction commodity (c4) at the national level, the positive import of this commodity by US in SB-MR-SAM is reduced to 0. To preserve model balance, the export of this commodity by US is reduced by the same amount.
	2. As BEA tables suggest no import of wholesale commodity (c10) at the national level, the positive import of this commodity by US in SB-MR-SAM is reduced to 0. To preserve model balance, the export of this commodity by US is reduced by the same amount.
	3. As BEA tables suggest no import or export of retail commodity (c11) at the national level, positive import and export of this commodity by US in SB-MR-SAM is reduced to 0. Introduced by this adjustment imbalance is corrected by adjusting the capital account. This modification preserves the production structure of the original model.
	4. The export of transport commodity (c9) by US outweighs the domestic production of this commodity. Although this does not imply model imbalance, this is inconsistent with the model specification that assumes ≥ 0 domestic use of domestic production (i.e., model adjusted for re-exports such as BEA SUTs). Thus, the export and import are adjusted (reduced) by averaged between import and export disc…
	To align all model components, the following BEA trade vector adjustments are applied:
	1. Export and import of ANR commodity (c3) are reduced by export and import of unprocessed fish and shellfish (NAICS 1125: Farmed Fish And Related Products and NAICS 1141: Fish, Fresh/chilled/frozen & Other Marine Products) reported in the US Trade database (US Census, 2021). This adjustment aligns data used for updating with the original tables that assume all fisheries products are passing thro…
	2. Seafood trade statistics are derived from US Trade as a sum of NAICS 1125, NAICS 1141 and NAICS 3117 (Seafood Prods, Prepared, Canned & Packaged). The value reported under NAIC 3117 is also deducted from the food production trade recorded in BEA tables to account for seafood disaggregation for general food commodity that previously included processed seafood.
	3. As the SB-MR-SAM model allocates beverages and tobacco production to other manufactured goods category (c8) and BEA reports values for aggregate 311FT: Food and beverage and tobacco products, reallocation of beverage and tobacco production is applied based on US trade statistics for NAICS 3121: Beverages and NAICS 3122: Tobacco Products.
	Note: NAICS stands for North American Industrial Classification System. NAICS is the standard used by Federal statistical agencies in classifying business establishments for the purpose of collecting, analyzing, and publishing statistical data related to the US business economy.

## Sheet: S2-2019
		ind 1-3	ind 4	ind 5	ind 6-8	ind 9	ind 10	ind 11	ind 12	FD1 (PCE)	FD2	com1	com2	com3	com4	com5	com6	com7	com8	com9	com10	com11	com12	W.c
	com1	-99.1253	0	0	0	0	0	0	0	0	0	0	0	0	0	0	0	0	0	0	0	0	0	1010101
	com2	-5362.1	0	0	0	0	0	0	0	0	0	0	0	0	0	0	0	0	0	0	0	0	0	1010101
	com3	-979853	0	0	-865	0	0	0	0	0	0	0	0	980718	0	0	0	0	0	0	0	0	0	1010101
	com4	0	-1805748	0	0	0	0	0	0	0	0	0	0	0	1805748	0	0	0	0	0	0	0	0	1010101
	com5	0	0	-554982	0	0	0	0	-163714	0	0	0	0	0	0	718696	0	0	0	0	0	0	0	1010101
	com6	0	0	0	-19503.8	0	0	0	0	0	0	0	0	0	0	0	19503.8	0	0	0	0	0	0	1010101
	com7	0	0	0	-786335	0	0	0	0	0	0	0	0	0	0	0	0	786335	0	0	0	0	0	1010101
	com8	-25435	0	0	-4901540	0	0	0	0	0	0	0	0	0	0	0	0	0	4926975	0	0	0	0	1010101
	com9	0	0	0	0	-1370719	0	0	-32933	0	0	0	0	0	0	0	0	0	0	1403652	0	0	0	1010101
	com10	0	0	0	0	0	-2102854	0	0	0	0	0	0	0	0	0	0	0	0	0	2102854	0	0	1010101
	com11	0	0	0	0	0	0	-1756789	-5638	0	0	0	0	0	0	0	0	0	0	0	0	1762427	0	1010101
	com12	-1956	0	-1872	-23524	-3812	0	0	-23059022	0	0	0	0	0	0	0	0	0	0	0	0	0	23090186	1010101
	com1	0	0	0	99.1253	0	0	0	0	0	0	0	0	0	0	0	0	0	0	0	0	0	0	1010101
	com2	0	0	0	5362.1	0	0	0	0	0	0	0	0	0	0	0	0	0	0	0	0	0	0	1010101
	com3	144562	20020.9	30165.2	413101	166.236	34	1038.01	34442.8	67577	127821	0	0	-980718	0	0	0	0	0	0	0	0	0	1010101
	com4	5904.27	234.08	8550.36	13758.9	6930.27	2139	4422.06	269715	0	1493990	0	0	0	-1805748	0	0	0	0	0	0	0	0	1010101
	com5	15869.8	5789.98	35302.3	58325	16773.3	18038	37614.5	241877	284748	-1	0	0	0	0	-718696	0	0	0	0	0	0	0	1010101
	com 6-8	111023	326507	16621.3	1.33987e+06	89173	52365	34282.5	814746	1299966	711633	0	0	0	0	0	-19503.8	-786335	-4926975	0	0	0	0	1010101
	com9	31416.5	33627.5	32437.6	197063	156196	83880	79900.1	253043	349329	62699	0	0	0	0	0	0	0	0	-1403652	0	0	0	1010101
	com10	59062.7	90802.1	7924.56	369314	28795.9	60858	30630.4	275288	608775	379264	0	0	0	0	0	0	0	0	0	-2102854	0	0	1010101
	com11	2361.71	89212.6	2333.74	20246.4	13666.6	1227	8252.11	59111.8	1462371	103644	0	0	0	0	0	0	0	0	0	0	-1762427	0	1010101
	com12	157904	169575	80594.8	437963	327204	585842	512590	6.298e+06	9466572	4268130	0	0	0	0	0	0	0	0	0	0	0	-23090186	1010101
	com1	0	0	0	0	0	0	0	0	0	0	0	0	0	0	0	0	0	0	0	0	0	0	1010101
	com2	0	0	0	0	0	0	0	0	0	0	0	0	0	0	0	0	0	0	0	0	0	0	1010101
	com3	7238.04	696.097	2242.83	142319	34.7756	7.25797	786.593	9245.29	23732.7	1081.44	0	0	0	0	0	0	0	0	0	0	0	0	1010101
	com4	0	0	0	0	0	0	0	0	0	0	0	0	0	0	0	0	0	0	0	0	0	0	1010101
	com5	31.1015	31.0106	80.9966	161.989	94.968	77	160.002	772.932	671	3	0	0	0	0	0	0	0	0	0	0	0	0	1010101
	com 6-8	35304.7	78032.9	9409.62	520127	24311.1	16738.7	17106.7	297567	678410	439932	0	0	0	0	0	0	0	0	0	0	0	0	1010101
	com9	105.344	84.0288	216.989	1312.97	103.898	1287	57.0008	15871.8	33199	7	0	0	0	0	0	0	0	0	0	0	0	0	1010101
	com10	0	0	0	0	0	0	0	0	0	0	0	0	0	0	0	0	0	0	0	0	0	0	1010101
	com11	0	0	0	0	0	0	0	0	0	0	0	0	0	0	0	0	0	0	0	0	0	0	1010101
	com12	4628.1	4700.61	3843.5	23606.4	25860.4	13452	9050.12	232064	153321	60158	0	0	0	0	0	0	0	0	0	0	0	0	1010101
	VA_L r1 ind 1-3	2249.84	0	0	0	0	0	0	0	0	0	0	0	0	0	0	0	0	0	0	0	0	0	-2249.84
	VA_L r1 ind 4	0	1840.47	0	0	0	0	0	0	0	0	0	0	0	0	0	0	0	0	0	0	0	0	1010101
	VA_L r1 ind 5	0	0	310.852	0	0	0	0	0	0	0	0	0	0	0	0	0	0	0	0	0	0	0	1010101
	VA_L r1 ind 6-8	0	0	0	900.951	0	0	0	0	0	0	0	0	0	0	0	0	0	0	0	0	0	0	-900.951
	VA_L r1 ind 9	0	0	0	0	1916.25	0	0	0	0	0	0	0	0	0	0	0	0	0	0	0	0	0	1010101
	VA_L r1 ind 10	0	0	0	0	0	511.135	0	0	0	0	0	0	0	0	0	0	0	0	0	0	0	0	1010101
	VA_L r1 ind 11	0	0	0	0	0	0	1363	0	0	0	0	0	0	0	0	0	0	0	0	0	0	0	1010101
	VA_L r1 ind 12	0	0	0	0	0	0	0	20015.6	0	0	0	0	0	0	0	0	0	0	0	0	0	0	1010101
	VA_L r2 ind 1-3	26210.9	0	0	0	0	0	0	0	0	0	0	0	0	0	0	0	0	0	0	0	0	0	-26210.9
	VA_L r2 ind 4	0	117218	0	0	0	0	0	0	0	0	0	0	0	0	0	0	0	0	0	0	0	0	1010101
	VA_L r2 ind 5	0	0	12070.9	0	0	0	0	0	0	0	0	0	0	0	0	0	0	0	0	0	0	0	1010101
	VA_L r2 ind 6-8	0	0	0	190366	0	0	0	0	0	0	0	0	0	0	0	0	0	0	0	0	0	0	-190366
	VA_L r2 ind 9	0	0	0	0	67793.3	0	0	0	0	0	0	0	0	0	0	0	0	0	0	0	0	0	1010101
	VA_L r2 ind 10	0	0	0	0	0	86064.7	0	0	0	0	0	0	0	0	0	0	0	0	0	0	0	0	1010101
	VA_L r2 ind 11	0	0	0	0	0	0	100756	0	0	0	0	0	0	0	0	0	0	0	0	0	0	0	1010101
	VA_L r2 ind 12	0	0	0	0	0	0	0	1.46886e+06	0	0	0	0	0	0	0	0	0	0	0	0	0	0	1010101
	VA_L r3 ind 1-3	107272	0	0	0	0	0	0	0	0	0	0	0	0	0	0	0	0	0	0	0	0	0	-107272
	VA_L r3 ind 4	0	533953	0	0	0	0	0	0	0	0	0	0	0	0	0	0	0	0	0	0	0	0	1010101
	VA_L r3 ind 5	0	0	73350.5	0	0	0	0	0	0	0	0	0	0	0	0	0	0	0	0	0	0	0	1010101
	VA_L r3 ind 6-8	0	0	0	846282	0	0	0	0	0	0	0	0	0	0	0	0	0	0	0	0	0	0	-846282
	VA_L r3 ind 9	0	0	0	0	338990	0	0	0	0	0	0	0	0	0	0	0	0	0	0	0	0	0	1010101
	VA_L r3 ind 10	0	0	0	0	0	464868	0	0	0	0	0	0	0	0	0	0	0	0	0	0	0	0	1010101
	VA_L r3 ind 11	0	0	0	0	0	0	465370	0	0	0	0	0	0	0	0	0	0	0	0	0	0	0	1010101
	VA_L r3 ind 12	0	0	0	0	0	0	0	6.53092e+06	0	0	0	0	0	0	0	0	0	0	0	0	0	0	1010101
	VA_P r1 ind 1-3	276.403	0	0	0	0	0	0	0	0	0	0	0	0	0	0	0	0	0	0	0	0	0	-276.403
	VA_P r1 ind 4	0	624.743	0	0	0	0	0	0	0	0	0	0	0	0	0	0	0	0	0	0	0	0	1010101
	VA_P r1 ind 5	0	0	6.3704	0	0	0	0	0	0	0	0	0	0	0	0	0	0	0	0	0	0	0	1010101
	VA_P r1 ind 6-8	0	0	0	71.2914	0	0	0	0	0	0	0	0	0	0	0	0	0	0	0	0	0	0	-71.2914
	VA_P r1 ind 9	0	0	0	0	233.336	0	0	0	0	0	0	0	0	0	0	0	0	0	0	0	0	0	1010101
	VA_P r1 ind 10	0	0	0	0	0	23.1288	0	0	0	0	0	0	0	0	0	0	0	0	0	0	0	0	1010101
	VA_P r1 ind 11	0	0	0	0	0	0	181.656	0	0	0	0	0	0	0	0	0	0	0	0	0	0	0	1010101
	VA_P r1 ind 12	0	0	0	0	0	0	0	1747.26	0	0	0	0	0	0	0	0	0	0	0	0	0	0	1010101
	VA_P r2 ind 1-3	11482.4	0	0	0	0	0	0	0	0	0	0	0	0	0	0	0	0	0	0	0	0	0	-11482.4
	VA_P r2 ind 4	0	35657.1	0	0	0	0	0	0	0	0	0	0	0	0	0	0	0	0	0	0	0	0	1010101
	VA_P r2 ind 5	0	0	4775.96	0	0	0	0	0	0	0	0	0	0	0	0	0	0	0	0	0	0	0	1010101
	VA_P r2 ind 6-8	0	0	0	2677.27	0	0	0	0	0	0	0	0	0	0	0	0	0	0	0	0	0	0	-2677.27
	VA_P r2 ind 9	0	0	0	0	18863.3	0	0	0	0	0	0	0	0	0	0	0	0	0	0	0	0	0	1010101
	VA_P r2 ind 10	0	0	0	0	0	6834.79	0	0	0	0	0	0	0	0	0	0	0	0	0	0	0	0	1010101
	VA_P r2 ind 11	0	0	0	0	0	0	14969.1	0	0	0	0	0	0	0	0	0	0	0	0	0	0	0	1010101
	VA_P r2 ind 12	0	0	0	0	0	0	0	200052	0	0	0	0	0	0	0	0	0	0	0	0	0	0	1010101
	VA_P r3 ind 1-3	108599	0	0	0	0	0	0	0	0	0	0	0	0	0	0	0	0	0	0	0	0	0	-108599
	VA_P r3 ind 4	0	196545	0	0	0	0	0	0	0	0	0	0	0	0	0	0	0	0	0	0	0	0	1010101
	VA_P r3 ind 5	0	0	16441.7	0	0	0	0	0	0	0	0	0	0	0	0	0	0	0	0	0	0	0	1010101
	VA_P r3 ind 6-8	0	0	0	45728.6	0	0	0	0	0	0	0	0	0	0	0	0	0	0	0	0	0	0	-45728.6
	VA_P r3 ind 9	0	0	0	0	89339.5	0	0	0	0	0	0	0	0	0	0	0	0	0	0	0	0	0	1010101
	VA_P r3 ind 10	0	0	0	0	0	37143.3	0	0	0	0	0	0	0	0	0	0	0	0	0	0	0	0	1010101
	VA_P r3 ind 11	0	0	0	0	0	0	50256.2	0	0	0	0	0	0	0	0	0	0	0	0	0	0	0	1010101
	VA_P r3 ind 12	0	0	0	0	0	0	0	758085	0	0	0	0	0	0	0	0	0	0	0	0	0	0	1010101
	VA_O r1 ind 1-3	4985.41	0	0	0	0	0	0	0	0	0	0	0	0	0	0	0	0	0	0	0	0	0	-4985.41
	VA_O r1 ind 4	0	358.355	0	0	0	0	0	0	0	0	0	0	0	0	0	0	0	0	0	0	0	0	1010101
	VA_O r1 ind 5	0	0	509.05	0	0	0	0	0	0	0	0	0	0	0	0	0	0	0	0	0	0	0	1010101
	VA_O r1 ind 6-8	0	0	0	439.505	0	0	0	0	0	0	0	0	0	0	0	0	0	0	0	0	0	0	-439.505
	VA_O r1 ind 9	0	0	0	0	5308.45	0	0	0	0	0	0	0	0	0	0	0	0	0	0	0	0	0	1010101
	VA_O r1 ind 10	0	0	0	0	0	973.657	0	0	0	0	0	0	0	0	0	0	0	0	0	0	0	0	1010101
	VA_O r1 ind 11	0	0	0	0	0	0	545.167	0	0	0	0	0	0	0	0	0	0	0	0	0	0	0	1010101
	VA_O r1 ind 12	0	0	0	0	0	0	0	9155.47	0	0	0	0	0	0	0	0	0	0	0	0	0	0	1010101
	VA_O r2 ind 1-3	19227.1	0	0	0	0	0	0	0	0	0	0	0	0	0	0	0	0	0	0	0	0	0	-19227.1
	VA_O r2 ind 4	0	21293.8	0	0	0	0	0	0	0	0	0	0	0	0	0	0	0	0	0	0	0	0	1010101
	VA_O r2 ind 5	0	0	30101.6	0	0	0	0	0	0	0	0	0	0	0	0	0	0	0	0	0	0	0	1010101
	VA_O r2 ind 6-8	0	0	0	226583	0	0	0	0	0	0	0	0	0	0	0	0	0	0	0	0	0	0	-226583
	VA_O r2 ind 9	0	0	0	0	27070.6	0	0	0	0	0	0	0	0	0	0	0	0	0	0	0	0	0	1010101
	VA_O r2 ind 10	0	0	0	0	0	120949	0	0	0	0	0	0	0	0	0	0	0	0	0	0	0	0	1010101
	VA_O r2 ind 11	0	0	0	0	0	0	79483	0	0	0	0	0	0	0	0	0	0	0	0	0	0	0	1010101
	VA_O r2 ind 12	0	0	0	0	0	0	0	1.00781e+06	0	0	0	0	0	0	0	0	0	0	0	0	0	0	1010101
	VA_O r3 ind 1-3	156991	0	0	0	0	0	0	0	0	0	0	0	0	0	0	0	0	0	0	0	0	0	-156991
	VA_O r3 ind 4	0	78944.7	0	0	0	0	0	0	0	0	0	0	0	0	0	0	0	0	0	0	0	0	1010101
	VA_O r3 ind 5	0	0	189563	0	0	0	0	0	0	0	0	0	0	0	0	0	0	0	0	0	0	0	1010101
	VA_O r3 ind 6-8	0	0	0	876084	0	0	0	0	0	0	0	0	0	0	0	0	0	0	0	0	0	0	-876084
	VA_O r3 ind 9	0	0	0	0	135705	0	0	0	0	0	0	0	0	0	0	0	0	0	0	0	0	0	1010101
	VA_O r3 ind 10	0	0	0	0	0	549541	0	0	0	0	0	0	0	0	0	0	0	0	0	0	0	0	1010101
	VA_O r3 ind 11	0	0	0	0	0	0	307974	0	0	0	0	0	0	0	0	0	0	0	0	0	0	0	1010101
	VA_O r3 ind 12	0	0	0	0	0	0	0	4.46292e+06	0	0	0	0	0	0	0	0	0	0	0	0	0	0	1010101
	W.r	1010101	1010101	1010101	1010101	1010101	1010101	1010101	1010101	1010101	-7648361	1010101	1010101	1010101	1010101	1010101	1010101	1010101	1010101	1010101	1010101	1010101	1010101	7648361

## Sheet: S2-2020
		ind 1-3	ind 4	ind 5	ind 6-8	ind 9	ind 10	ind 11	ind 12	FD1 (PCE)	FD2	com1	com2	com3	com4	com5	com6	com7	com8	com9	com10	com11	com12	W.c
	com1	-69.8999	0	0	0	0	0	0	0	0	0	0	0	0	0	0	0	0	0	0	0	0	0	1010101
	com2	-4616.78	0	0	0	0	0	0	0	0	0	0	0	0	0	0	0	0	0	0	0	0	0	1010101
	com3	-824231	0	0	-876	0	0	0	0	0	0	0	0	825107	0	0	0	0	0	0	0	0	0	1010101
	com4	0	-1869488	0	0	0	0	0	0	0	0	0	0	0	1869488	0	0	0	0	0	0	0	0	1010101
	com5	0	0	-523146	0	0	0	0	-162977	0	0	0	0	0	0	686123	0	0	0	0	0	0	0	1010101
	com6	0	0	0	-17709.1	0	0	0	0	0	0	0	0	0	0	0	17709.1	0	0	0	0	0	0	1010101
	com7	0	0	0	-783647	0	0	0	0	0	0	0	0	0	0	0	0	783647	0	0	0	0	0	1010101
	com8	-19412	0	0	-4490135	0	0	0	0	0	0	0	0	0	0	0	0	0	4509547	0	0	0	0	1010101
	com9	0	0	0	0	-1166228	0	0	-31433	0	0	0	0	0	0	0	0	0	0	1197661	0	0	0	1010101
	com10	0	0	0	0	0	-2059625	0	0	0	0	0	0	0	0	0	0	0	0	0	2059625	0	0	1010101
	com11	0	0	0	0	0	0	-1837711	-5788	0	0	0	0	0	0	0	0	0	0	0	0	1843499	0	1010101
	com12	-1929	0	-1915	-21229	-2931	0	0	-22657433	0	0	0	0	0	0	0	0	0	0	0	0	0	22685437	1010101
	com1	0	0	0	69.8999	0	0	0	0	0	0	0	0	0	0	0	0	0	0	0	0	0	0	1010101
	com2	0	0	0	4616.78	0	0	0	0	0	0	0	0	0	0	0	0	0	0	0	0	0	0	1010101
	com3	127580	21234.6	21917.8	348396	169.069	38	1196.01	31617	74890	76798	0	0	-825107	0	0	0	0	0	0	0	0	0	1010101
	com4	5962.7	309.097	5554.24	12967.9	5724.69	2423	4952.04	282887	0	1548600	0	0	0	-1869488	0	0	0	0	0	0	0	0	1010101
	com5	13905.6	6142.92	32402.2	50705.1	14382.1	17239	36544.3	224490	287268	-3	0	0	0	0	-686123	0	0	0	0	0	0	0	1010101
	com 6-8	104648	337196	9569.67	1.26853e+06	50870.3	55739	38879.3	730453	1350150	592822	0	0	0	0	0	-17709.1	-783647	-4509547	0	0	0	0	1010101
	com9	28154.3	34071.7	30976.4	179686	151324	81128	85453.7	228362	232422	55510	0	0	0	0	0	0	0	0	-1197661	0	0	0	1010101
	com10	59037.2	100299	7751.5	357566	20330.4	54987	38123.3	261047	615615	364339	0	0	0	0	0	0	0	0	0	-2059625	0	0	1010101
	com11	2939.22	101083	3082.63	22427.4	8155.3	1502	11572.1	55298.8	1525318	112121	0	0	0	0	0	0	0	0	0	0	-1843499	0	1010101
	com12	129855	210913	67448.5	398735	306392	574199	526206	6.20627e+06	9184056	4422597	0	0	0	0	0	0	0	0	0	0	0	-22685437	1010101
	com1	0	0	0	0	0	0	0	0	0	0	0	0	0	0	0	0	0	0	0	0	0	0	1010101
	com2	0	0	0	0	0	0	0	0	0	0	0	0	0	0	0	0	0	0	0	0	0	0	1010101
	com3	5412.99	557.08	1615.57	92232.7	27.7713	6.1488	788.809	7574.3	24907	809.885	0	0	0	0	0	0	0	0	0	0	0	0	1010101
	com4	0	0	0	0	0	0	0	0	0	0	0	0	0	0	0	0	0	0	0	0	0	0	1010101
	com5	29.0913	23.0072	61.9963	147.993	89.9828	80	171.001	740.928	734	3	0	0	0	0	0	0	0	0	0	0	0	0	1010101
	com 6-8	32538.9	74651.5	7498.72	476485	15905.2	18311.9	32226.4	286109	684063	364970	0	0	0	0	0	0	0	0	0	0	0	0	1010101
	com9	29.0913	35.011	103.996	567.988	40.9839	560	23.0002	7430.93	3783	3	0	0	0	0	0	0	0	0	0	0	0	0	1010101
	com10	0	0	0	0	0	0	0	0	0	0	0	0	0	0	0	0	0	0	0	0	0	0	1010101
	com11	0	0	0	0	0	0	0	0	0	0	0	0	0	0	0	0	0	0	0	0	0	0	1010101
	com12	3390.64	5969.87	1538.57	24825.1	21523.1	12738	10027.1	232997	64362	56130	0	0	0	0	0	0	0	0	0	0	0	0	1010101
	VA_L r1 ind 1-3	2077.77	0	0	0	0	0	0	0	0	0	0	0	0	0	0	0	0	0	0	0	0	0	-2077.77
	VA_L r1 ind 4	0	1791.64	0	0	0	0	0	0	0	0	0	0	0	0	0	0	0	0	0	0	0	0	1010101
	VA_L r1 ind 5	0	0	358.189	0	0	0	0	0	0	0	0	0	0	0	0	0	0	0	0	0	0	0	1010101
	VA_L r1 ind 6-8	0	0	0	861.536	0	0	0	0	0	0	0	0	0	0	0	0	0	0	0	0	0	0	-861.536
	VA_L r1 ind 9	0	0	0	0	1833.03	0	0	0	0	0	0	0	0	0	0	0	0	0	0	0	0	0	1010101
	VA_L r1 ind 10	0	0	0	0	0	496.602	0	0	0	0	0	0	0	0	0	0	0	0	0	0	0	0	1010101
	VA_L r1 ind 11	0	0	0	0	0	0	1380.5	0	0	0	0	0	0	0	0	0	0	0	0	0	0	0	1010101
	VA_L r1 ind 12	0	0	0	0	0	0	0	19996.5	0	0	0	0	0	0	0	0	0	0	0	0	0	0	1010101
	VA_L r2 ind 1-3	27400	0	0	0	0	0	0	0	0	0	0	0	0	0	0	0	0	0	0	0	0	0	-27400
	VA_L r2 ind 4	0	118195	0	0	0	0	0	0	0	0	0	0	0	0	0	0	0	0	0	0	0	0	1010101
	VA_L r2 ind 5	0	0	13563.5	0	0	0	0	0	0	0	0	0	0	0	0	0	0	0	0	0	0	0	1010101
	VA_L r2 ind 6-8	0	0	0	196010	0	0	0	0	0	0	0	0	0	0	0	0	0	0	0	0	0	0	-196010
	VA_L r2 ind 9	0	0	0	0	68406.5	0	0	0	0	0	0	0	0	0	0	0	0	0	0	0	0	0	1010101
	VA_L r2 ind 10	0	0	0	0	0	86799.5	0	0	0	0	0	0	0	0	0	0	0	0	0	0	0	0	1010101
	VA_L r2 ind 11	0	0	0	0	0	0	105190	0	0	0	0	0	0	0	0	0	0	0	0	0	0	0	1010101
	VA_L r2 ind 12	0	0	0	0	0	0	0	1.5128e+06	0	0	0	0	0	0	0	0	0	0	0	0	0	0	1010101
	VA_L r3 ind 1-3	93828.9	0	0	0	0	0	0	0	0	0	0	0	0	0	0	0	0	0	0	0	0	0	-93828.9
	VA_L r3 ind 4	0	532535	0	0	0	0	0	0	0	0	0	0	0	0	0	0	0	0	0	0	0	0	1010101
	VA_L r3 ind 5	0	0	77232.7	0	0	0	0	0	0	0	0	0	0	0	0	0	0	0	0	0	0	0	1010101
	VA_L r3 ind 6-8	0	0	0	825441	0	0	0	0	0	0	0	0	0	0	0	0	0	0	0	0	0	0	-825441
	VA_L r3 ind 9	0	0	0	0	343505	0	0	0	0	0	0	0	0	0	0	0	0	0	0	0	0	0	1010101
	VA_L r3 ind 10	0	0	0	0	0	469389	0	0	0	0	0	0	0	0	0	0	0	0	0	0	0	0	1010101
	VA_L r3 ind 11	0	0	0	0	0	0	476130	0	0	0	0	0	0	0	0	0	0	0	0	0	0	0	1010101
	VA_L r3 ind 12	0	0	0	0	0	0	0	6.60488e+06	0	0	0	0	0	0	0	0	0	0	0	0	0	0	1010101
	VA_P r1 ind 1-3	270.126	0	0	0	0	0	0	0	0	0	0	0	0	0	0	0	0	0	0	0	0	0	-270.126
	VA_P r1 ind 4	0	678.257	0	0	0	0	0	0	0	0	0	0	0	0	0	0	0	0	0	0	0	0	1010101
	VA_P r1 ind 5	0	0	7.95458	0	0	0	0	0	0	0	0	0	0	0	0	0	0	0	0	0	0	0	1010101
	VA_P r1 ind 6-8	0	0	0	73.3792	0	0	0	0	0	0	0	0	0	0	0	0	0	0	0	0	0	0	-73.3792
	VA_P r1 ind 9	0	0	0	0	267.233	0	0	0	0	0	0	0	0	0	0	0	0	0	0	0	0	0	1010101
	VA_P r1 ind 10	0	0	0	0	0	26.166	0	0	0	0	0	0	0	0	0	0	0	0	0	0	0	0	1010101
	VA_P r1 ind 11	0	0	0	0	0	0	193.447	0	0	0	0	0	0	0	0	0	0	0	0	0	0	0	1010101
	VA_P r1 ind 12	0	0	0	0	0	0	0	1801.04	0	0	0	0	0	0	0	0	0	0	0	0	0	0	1010101
	VA_P r2 ind 1-3	19934.1	0	0	0	0	0	0	0	0	0	0	0	0	0	0	0	0	0	0	0	0	0	-19934.1
	VA_P r2 ind 4	0	37156.7	0	0	0	0	0	0	0	0	0	0	0	0	0	0	0	0	0	0	0	0	1010101
	VA_P r2 ind 5	0	0	5062.75	0	0	0	0	0	0	0	0	0	0	0	0	0	0	0	0	0	0	0	1010101
	VA_P r2 ind 6-8	0	0	0	3259.55	0	0	0	0	0	0	0	0	0	0	0	0	0	0	0	0	0	0	-3259.55
	VA_P r2 ind 9	0	0	0	0	18127.8	0	0	0	0	0	0	0	0	0	0	0	0	0	0	0	0	0	1010101
	VA_P r2 ind 10	0	0	0	0	0	7408.65	0	0	0	0	0	0	0	0	0	0	0	0	0	0	0	0	1010101
	VA_P r2 ind 11	0	0	0	0	0	0	15545.5	0	0	0	0	0	0	0	0	0	0	0	0	0	0	0	1010101
	VA_P r2 ind 12	0	0	0	0	0	0	0	198248	0	0	0	0	0	0	0	0	0	0	0	0	0	0	1010101
	VA_P r3 ind 1-3	129075	0	0	0	0	0	0	0	0	0	0	0	0	0	0	0	0	0	0	0	0	0	-129075
	VA_P r3 ind 4	0	210646	0	0	0	0	0	0	0	0	0	0	0	0	0	0	0	0	0	0	0	0	1010101
	VA_P r3 ind 5	0	0	17469.4	0	0	0	0	0	0	0	0	0	0	0	0	0	0	0	0	0	0	0	1010101
	VA_P r3 ind 6-8	0	0	0	42134.1	0	0	0	0	0	0	0	0	0	0	0	0	0	0	0	0	0	0	-42134.1
	VA_P r3 ind 9	0	0	0	0	89148.4	0	0	0	0	0	0	0	0	0	0	0	0	0	0	0	0	0	1010101
	VA_P r3 ind 10	0	0	0	0	0	38162.2	0	0	0	0	0	0	0	0	0	0	0	0	0	0	0	0	1010101
	VA_P r3 ind 11	0	0	0	0	0	0	53604.2	0	0	0	0	0	0	0	0	0	0	0	0	0	0	0	1010101
	VA_P r3 ind 12	0	0	0	0	0	0	0	770876	0	0	0	0	0	0	0	0	0	0	0	0	0	0	1010101
	VA_O r1 ind 1-3	2592.57	0	0	0	0	0	0	0	0	0	0	0	0	0	0	0	0	0	0	0	0	0	-2592.57
	VA_O r1 ind 4	0	277.95	0	0	0	0	0	0	0	0	0	0	0	0	0	0	0	0	0	0	0	0	1010101
	VA_O r1 ind 5	0	0	503.531	0	0	0	0	0	0	0	0	0	0	0	0	0	0	0	0	0	0	0	1010101
	VA_O r1 ind 6-8	0	0	0	325.383	0	0	0	0	0	0	0	0	0	0	0	0	0	0	0	0	0	0	-325.383
	VA_O r1 ind 9	0	0	0	0	4570.91	0	0	0	0	0	0	0	0	0	0	0	0	0	0	0	0	0	1010101
	VA_O r1 ind 10	0	0	0	0	0	883.88	0	0	0	0	0	0	0	0	0	0	0	0	0	0	0	0	1010101
	VA_O r1 ind 11	0	0	0	0	0	0	559.196	0	0	0	0	0	0	0	0	0	0	0	0	0	0	0	1010101
	VA_O r1 ind 12	0	0	0	0	0	0	0	7993.26	0	0	0	0	0	0	0	0	0	0	0	0	0	0	1010101
	VA_O r2 ind 1-3	9977.74	0	0	0	0	0	0	0	0	0	0	0	0	0	0	0	0	0	0	0	0	0	-9977.74
	VA_O r2 ind 4	0	16696.3	0	0	0	0	0	0	0	0	0	0	0	0	0	0	0	0	0	0	0	0	1010101
	VA_O r2 ind 5	0	0	31312.2	0	0	0	0	0	0	0	0	0	0	0	0	0	0	0	0	0	0	0	1010101
	VA_O r2 ind 6-8	0	0	0	208185	0	0	0	0	0	0	0	0	0	0	0	0	0	0	0	0	0	0	-208185
	VA_O r2 ind 9	0	0	0	0	6381.54	0	0	0	0	0	0	0	0	0	0	0	0	0	0	0	0	0	1010101
	VA_O r2 ind 10	0	0	0	0	0	112707	0	0	0	0	0	0	0	0	0	0	0	0	0	0	0	0	1010101
	VA_O r2 ind 11	0	0	0	0	0	0	80838.1	0	0	0	0	0	0	0	0	0	0	0	0	0	0	0	1010101
	VA_O r2 ind 12	0	0	0	0	0	0	0	956018	0	0	0	0	0	0	0	0	0	0	0	0	0	0	1010101
	VA_O r3 ind 1-3	51619.2	0	0	0	0	0	0	0	0	0	0	0	0	0	0	0	0	0	0	0	0	0	-51619.2
	VA_O r3 ind 4	0	59026.1	0	0	0	0	0	0	0	0	0	0	0	0	0	0	0	0	0	0	0	0	1010101
	VA_O r3 ind 5	0	0	190029	0	0	0	0	0	0	0	0	0	0	0	0	0	0	0	0	0	0	0	1010101
	VA_O r3 ind 6-8	0	0	0	799350	0	0	0	0	0	0	0	0	0	0	0	0	0	0	0	0	0	0	-799350
	VA_O r3 ind 9	0	0	0	0	41983.7	0	0	0	0	0	0	0	0	0	0	0	0	0	0	0	0	0	1010101
	VA_O r3 ind 10	0	0	0	0	0	524801	0	0	0	0	0	0	0	0	0	0	0	0	0	0	0	0	1010101
	VA_O r3 ind 11	0	0	0	0	0	0	318107	0	0	0	0	0	0	0	0	0	0	0	0	0	0	0	1010101
	VA_O r3 ind 12	0	0	0	0	0	0	0	4.22974e+06	0	0	0	0	0	0	0	0	0	0	0	0	0	0	1010101
	W.r	1010101	1010101	1010101	1010101	1010101	1010101	1010101	1010101	1010101	-7594700	1010101	1010101	1010101	1010101	1010101	1010101	1010101	1010101	1010101	1010101	1010101	1010101	7594700

## Sheet: W1-19-aggr
		1	2	3	4	5	6	7	8	9	10	11	12	13	14	15	16	17	18	19	20
		IND [Fish+Agr]	IND4	IND5	IND [man]	IND9	IND10	IND11	IND12	FD1	FD2	com1	com2	com3	com4	com5	com6-8	com9	com10	com11	com12	W.c		VA	2.14332e+07
1	com1	-92.6361	0	0	0	0	0	0	0	0	0	0	0	0	0	0	0	0	0	0	0	1010101		EXP / available	2178430
2	com2	-5435.93	0	0	0	0	0	0	0	0	0	0	0	0	0	0	0	0	0	0	0	1010101		FDd+EXP-M	21433243
3	com3	-982170	0	0	-941	0	0	0	0	0	0	0	0	983111	0	0	0	0	0	0	0	1010101
4	com4	0	-1787197	0	0	0	0	0	0	0	0	0	0	0	1787197	0	0	0	0	0	0	1010101		BALANCE	0
5	com5	0	0	-495154	0	0	0	0	-161052	0	0	0	0	0	0	656206	0	0	0	0	0	1010101
6	com6-8 (man)	-23182	0	0	-6.00005e+06	0	0	0	0	0	0	0	0	0	0	0	6.01898e+06	0	0	0	0	1010101
7	com9	0	0	0	0	-1352881	0	0	-32741	0	0	0	0	0	0	0	0	1385622	0	0	0	1010101		E0
8	com10	0	0	0	0	0	-2068377	0	0	0	0	0	0	0	0	0	0	0	2068377	0	0	1010101		0	92.6361
9	com11	0	0	0	0	0	0	-1780016	-5500	0	0	0	0	0	0	0	0	0	0	1785516	0	1010101		0	5435.93
10	com12	-2407	0	-2124	-25971	-3976	0	0	-23093161	0	0	0	0	0	0	0	0	0	0	0	23127639	1010101		142510	-142510	0
11	com1	0	0	0	92.6361	0	0	0	0	0	0	0	0	0	0	0	0	0	0	0	0	1010101	x	101	-101	0
12	com2	0	0	0	5435.93	0	0	0	0	0	0	0	0	0	0	0	0	0	0	0	0	1010101	x	4375	-4375	0
13	com3	142840	20830.4	25092.5	427365	131.419	51	1886.02	38039.6	61303	123062	0	0	-983111	0	0	0	0	0	0	0	1010101		5711.25	-955204	4249.71
14	com4	5198.98	217.067	6839.51	14198.9	5917.87	1983	4460.06	268568	0	1479713	0	0	0	-1787197	0	0	0	0	0	0	101		57110.3
15	com5	13487	4736.46	22543.7	55595.5	12149.4	15041	32959.4	207995	287323	0	0	0	0	0	-656206	0	0	0	0	0	4375		896632
16	com6-8 (man)	110168	335861	10298.6	1.5092e+06	81237.9	51227	36015.4	853197	1342914	733663	0	0	0	0	0	-6.01898e+06	0	0	0	0	1010101	x	119007	-119007	0
17	com9	31399.5	32252.9	27821	203567	153731	82894	78898	261019	339949	55083	0	0	0	0	0	0	-1385622	0	0	0	119007	x	191276	-191276	0
18	com10	55387.9	86413.6	6205.75	390747	26540.5	57498	31001.4	265347	593220	364740	0	0	0	0	0	0	0	-2068377	0	0	191276		0	0	0
19	com11	2304.53	88817.4	1689.78	23488.6	12424.6	1184	8705.11	50938	1489087	106877	0	0	0	0	0	0	0	0	-1785516	0	1010101	x	761708	-761708	0
20	com12	143877	163044	55765.4	495001	317459	571705	536715	6.28246e+06	9567410	4232497	0	0	0	0	0	0	0	0	0	-23127639	761708
21	com1	0	0	0	0	0	0	0	0	0	0	0	0	0	0	0	0	0	0	0	0	1010101		M0
22	com2	0	0	0	0	0	0	0	0	0	0	0	0	0	0	0	0	0	0	0	0	1010101		0	0
23	com3	7066.72	466.634	1919.75	144064	32.1105	8.16812	859.478	9630.14	22894.3	1170.76	0	0	0	0	0	0	0	0	0	0	1010101		0	0
24	com4	0	0	0	0	0	0	0	0	0	0	0	0	0	0	0	0	0	0	0	0	1010101		188112	2.00002e-06
25	com5	28.0917	18.0056	56.9973	171.994	79.9706	72	157.002	734.938	765	2	0	0	0	0	0	0	0	0	0	0	-2086		0	0
26	com6-8 (man)	33295.1	67053.2	8002.43	570473	22272.2	16548.8	17685.8	288793	655951	448905	0	0	0	0	0	0	0	0	0	0	1010101	x	2086	0
27	com9	77.2523	65.02	150.993	1468.98	94.9237	1279	63.0008	14993.8	28602	3	0	0	0	0	0	0	0	0	0	0	-46798		22296.1	-2.00002e-06
28	com10	0	0	0	0	0	0	0	0	0	0	0	0	0	0	0	0	0	0	0	0	1010101		72083.7
29	com11	0	0	0	0	0	0	0	0	0	0	0	0	0	0	0	0	0	0	0	0	1010101		2.0346e+06
30	com12	4599.02	4036.24	1377.56	31302.7	24280.4	13765	10587.1	224397	155180	55553	0	0	0	0	0	0	0	0	0	0	-525078	x	46798	0
31	LAB r1-FISH+AGR	2274.19	0	0	0	0	0	0	0	0	0	0	0	0	0	0	0	0	0	0	0	-2274.19		0	0
32	r1-ind4	0	1833.02	0	0	0	0	0	0	0	0	0	0	0	0	0	0	0	0	0	0	1010101		0	0
33	r1-ind5	0	0	314.681	0	0	0	0	0	0	0	0	0	0	0	0	0	0	0	0	0	1010101	x	525078	0
34	r1-MANU (6-8)	0	0	0	829.527	0	0	0	0	0	0	0	0	0	0	0	0	0	0	0	0	-829.527
35	r1-ind9	0	0	0	0	1918.62	0	0	0	0	0	0	0	0	0	0	0	0	0	0	0	1010101
36	r1-ind10	0	0	0	0	0	513.928	0	0	0	0	0	0	0	0	0	0	0	0	0	0	1010101
37	r1-ind11	0	0	0	0	0	0	1366.79	0	0	0	0	0	0	0	0	0	0	0	0	0	1010101
38	r1-ind12	0	0	0	0	0	0	0	20102.3	0	0	0	0	0	0	0	0	0	0	0	0	1010101
39	LAB r2-FISH+AGR	26802.1	0	0	0	0	0	0	0	0	0	0	0	0	0	0	0	0	0	0	0	-26802.1
40	r2-ind4	0	116895	0	0	0	0	0	0	0	0	0	0	0	0	0	0	0	0	0	0	1010101
41	r2-ind5	0	0	12193.6	0	0	0	0	0	0	0	0	0	0	0	0	0	0	0	0	0	1010101
42	r2-MANU (6-8)	0	0	0	190302	0	0	0	0	0	0	0	0	0	0	0	0	0	0	0	0	-190302
43	r2-ind9	0	0	0	0	68584.3	0	0	0	0	0	0	0	0	0	0	0	0	0	0	0	1010101
44	r2-ind10	0	0	0	0	0	86618.2	0	0	0	0	0	0	0	0	0	0	0	0	0	0	1010101
45	r2-ind11	0	0	0	0	0	0	101226	0	0	0	0	0	0	0	0	0	0	0	0	0	1010101
46	r2-ind12	0	0	0	0	0	0	0	1.47129e+06	0	0	0	0	0	0	0	0	0	0	0	0	1010101
47	LAB r3-FISH+AGR	108475	0	0	0	0	0	0	0	0	0	0	0	0	0	0	0	0	0	0	0	-108475
48	r3-ind4	0	532221	0	0	0	0	0	0	0	0	0	0	0	0	0	0	0	0	0	0	1010101
49	r3-ind5	0	0	73968.9	0	0	0	0	0	0	0	0	0	0	0	0	0	0	0	0	0	1010101
50	r3-MANU (6-8)	0	0	0	844884	0	0	0	0	0	0	0	0	0	0	0	0	0	0	0	0	-844884
51	r3-ind9	0	0	0	0	339341	0	0	0	0	0	0	0	0	0	0	0	0	0	0	0	1010101
52	r3-ind10	0	0	0	0	0	466882	0	0	0	0	0	0	0	0	0	0	0	0	0	0	1010101
53	r3-ind11	0	0	0	0	0	0	466826	0	0	0	0	0	0	0	0	0	0	0	0	0	1010101
54	r3-ind12	0	0	0	0	0	0	0	6.48016e+06	0	0	0	0	0	0	0	0	0	0	0	0	1010101
55	CAP r1-FISH+AGR	5177.36	0	0	0	0	0	0	0	0	0	0	0	0	0	0	0	0	0	0	0	-5177.36
56	r1-ind4	0	420.306	0	0	0	0	0	0	0	0	0	0	0	0	0	0	0	0	0	0	1010101
57	r1-ind5	0	0	521.02	0	0	0	0	0	0	0	0	0	0	0	0	0	0	0	0	0	1010101
58	r1-MANU (6-8)	0	0	0	893.456	0	0	0	0	0	0	0	0	0	0	0	0	0	0	0	0	-893.456
59	r1-ind9	0	0	0	0	5624.41	0	0	0	0	0	0	0	0	0	0	0	0	0	0	0	1010101
60	r1-ind10	0	0	0	0	0	1006.91	0	0	0	0	0	0	0	0	0	0	0	0	0	0	1010101
61	r1-ind11	0	0	0	0	0	0	697.538	0	0	0	0	0	0	0	0	0	0	0	0	0	1010101
62	r1-ind12	0	0	0	0	0	0	0	10891.7	0	0	0	0	0	0	0	0	0	0	0	0	1010101
63	CAP r2-FISH+AGR	31413.3	0	0	0	0	0	0	0	0	0	0	0	0	0	0	0	0	0	0	0	-31413.3
64	r2-ind4	0	57044.2	0	0	0	0	0	0	0	0	0	0	0	0	0	0	0	0	0	0	1010101
65	r2-ind5	0	0	36483.1	0	0	0	0	0	0	0	0	0	0	0	0	0	0	0	0	0	1010101
66	r2-MANU (6-8)	0	0	0	197918	0	0	0	0	0	0	0	0	0	0	0	0	0	0	0	0	-197918
67	r2-ind9	0	0	0	0	46198.4	0	0	0	0	0	0	0	0	0	0	0	0	0	0	0	1010101
68	r2-ind10	0	0	0	0	0	124621	0	0	0	0	0	0	0	0	0	0	0	0	0	0	1010101
69	r2-ind11	0	0	0	0	0	0	90773.2	0	0	0	0	0	0	0	0	0	0	0	0	0	1010101
70	r2-ind12	0	0	0	0	0	0	0	1.34106e+06	0	0	0	0	0	0	0	0	0	0	0	0	1010101
71	CAP r3-FISH+AGR	289417	0	0	0	0	0	0	0	0	0	0	0	0	0	0	0	0	0	0	0	-289417
72	r3-ind4	0	274972	0	0	0	0	0	0	0	0	0	0	0	0	0	0	0	0	0	0	1010101
73	r3-ind5	0	0	206033	0	0	0	0	0	0	0	0	0	0	0	0	0	0	0	0	0	1010101
74	r3-MANU (6-8)	0	0	0	919965	0	0	0	0	0	0	0	0	0	0	0	0	0	0	0	0	-919965
75	r3-ind9	0	0	0	0	238838	0	0	0	0	0	0	0	0	0	0	0	0	0	0	0	1010101
76	r3-ind10	0	0	0	0	0	575479	0	0	0	0	0	0	0	0	0	0	0	0	0	0	1010101
77	r3-ind11	0	0	0	0	0	0	359135	0	0	0	0	0	0	0	0	0	0	0	0	0	1010101
78	r3-ind12	0	0	0	0	0	0	0	5.20284e+06	0	0	0	0	0	0	0	0	0	0	0	0	1010101
	W.r	1010101	1010101	1010101	1010101	1010101	1010101	1010101	1010101	1010101	-7601269	1010101	1010101	1010101	1010101	1010101	1010101	1010101	1010101	1010101	1010101	7601269
	SUM	-5.82077e-11	1.16415e-10	0	2.21189e-09	5.82077e-11	0	-1.16415e-10	0	14544598	7601269	0	0	0	0	0	0	0	0	0	0		7.45058e-09
	RESULTS
		IND [Fish+Agr]	IND4	IND5	IND [man]	IND9	IND10	IND11	IND12	FD1	FD2	com1	com2	com3	com4	com5	com6	com9	com10	com11	com12
1	com1	-92.6361	0	0	0	0	0	0	0	0	0	0	0	0	0	0	0	0	0	0	0
2	com2	-5435.93	0	0	0	0	0	0	0	0	0	0	0	0	0	0	0	0	0	0	0
3	com3	-982170	0	0	-941	0	0	0	0	0	0	0	0	983111	0	0	0	0	0	0	0
4	com4	0	-1.7872e+06	0	0	0	0	0	0	0	0	0	0	0	1787197	0	0	0	0	0	0
5	com5	0	0	-495154	0	0	0	0	-161052	0	0	0	0	0	0	656206	0	0	0	0	0
6	com6-8 (man)	-23182	0	0	-6.00005e+06	0	0	0	0	0	0	0	0	0	0	0	6.01898e+06	0	0	0	0
7	com9	0	0	0	0	-1352881	0	0	-32741	0	0	0	0	0	0	0	0	1385622	0	0	0
8	com10	0	0	0	0	0	-2.06838e+06	0	0	0	0	0	0	0	0	0	0	0	2.06838e+06	0	0
9	com11	0	0	0	0	0	0	-1780016	-5500	0	0	0	0	0	0	0	0	0	0	1785516	0
10	com12	-2407	0	-2124	-25971	-3976	0	0	-23093161	0	0	0	0	0	0	0	0	0	0	0	23127639
11	com1	0	0	0	92.6361	0	0	0	0	0	0	0	0	0	0	0	0	0	0	0	0
12	com2	0	0	0	5435.93	0	0	0	0	0	0	0	0	0	0	0	0	0	0	0	0
13	com3	142840	20830.4	25092.5	427365	131.419	51	1886.02	38039.6	61303	123062	0	0	-983111	0	0	0	0	0	0	0
14	com4	5198.98	217.067	6839.51	14198.9	5917.87	1983	4460.06	268568	0	1479713	0	0	0	-1.7872e+06	0	0	0	0	0	0
15	com5	13487	4736.46	22543.7	55595.5	12149.4	15041	32959.4	207995	287323	0	0	0	0	0	-656206	0	0	0	0	0
16	com6-8 (man)	110168	335861	10298.6	1.5092e+06	81237.9	51227	36015.4	853197	1.34291e+06	733663	0	0	0	0	0	-6.01898e+06	0	0	0	0
17	com9	31399.5	32252.9	27821	203567	153731	82894	78898	261019	339949	55083	0	0	0	0	0	0	-1385622	0	0	0
18	com10	55387.9	86413.6	6205.75	390747	26540.5	57498	31001.4	265347	593220	364740	0	0	0	0	0	0	0	-2.06838e+06	0	0
19	com11	2304.53	88817.4	1689.78	23488.6	12424.6	1184	8705.11	50938	1.48909e+06	106877	0	0	0	0	0	0	0	0	-1785516	0
20	com12	143877	163044	55765.4	495001	317459	571705	536715	6.28246e+06	9.56741e+06	4.2325e+06	0	0	0	0	0	0	0	0	0	-23127639
21	com1	0	0	0	0	0	0	0	0	0	0	0	0	0	0	0	0	0	0	0	0
22	com2	0	0	0	0	0	0	0	0	0	0	0	0	0	0	0	0	0	0	0	0
23	com3	7066.72	466.634	1919.75	144064	32.1105	8.16812	859.478	9630.14	22894.3	1170.76	0	0	0	0	0	0	0	0	0	0
24	com4	0	0	0	0	0	0	0	0	0	0	0	0	0	0	0	0	0	0	0	0
25	com5	28.0917	18.0056	56.9973	171.994	79.9706	72	157.002	734.938	765	2	0	0	0	0	0	0	0	0	0	0
26	com6-8 (man)	33295.1	67053.2	8002.43	570473	22272.2	16548.8	17685.8	288793	655951	448905	0	0	0	0	0	0	0	0	0	0
27	com9	77.2523	65.02	150.993	1468.98	94.9237	1279	63.0008	14993.8	28602	3	0	0	0	0	0	0	0	0	0	0
28	com10	0	0	0	0	0	0	0	0	0	0	0	0	0	0	0	0	0	0	0	0
29	com11	0	0	0	0	0	0	0	0	0	0	0	0	0	0	0	0	0	0	0	0
30	com12	4599.02	4036.24	1377.56	31302.7	24280.4	13765	10587.1	224397	155180	55553	0	0	0	0	0	0	0	0	0	0
31	LAB r1-FISH+AGR	2274.19	0	0	0	0	0	0	0	0	0	0	0	0	0	0	0	0	0	0	0
32	r1-ind4	0	1833.02	0	0	0	0	0	0	0	0	0	0	0	0	0	0	0	0	0	0
33	r1-ind5	0	0	314.681	0	0	0	0	0	0	0	0	0	0	0	0	0	0	0	0	0
34	r1-MANU (6-8)	0	0	0	829.527	0	0	0	0	0	0	0	0	0	0	0	0	0	0	0	0
35	r1-ind9	0	0	0	0	1918.62	0	0	0	0	0	0	0	0	0	0	0	0	0	0	0
36	r1-ind10	0	0	0	0	0	513.928	0	0	0	0	0	0	0	0	0	0	0	0	0	0
37	r1-ind11	0	0	0	0	0	0	1366.79	0	0	0	0	0	0	0	0	0	0	0	0	0
38	r1-ind12	0	0	0	0	0	0	0	20102.3	0	0	0	0	0	0	0	0	0	0	0	0
39	LAB r2-FISH+AGR	26802.1	0	0	0	0	0	0	0	0	0	0	0	0	0	0	0	0	0	0	0
40	r2-ind4	0	116895	0	0	0	0	0	0	0	0	0	0	0	0	0	0	0	0	0	0
41	r2-ind5	0	0	12193.6	0	0	0	0	0	0	0	0	0	0	0	0	0	0	0	0	0
42	r2-MANU (6-8)	0	0	0	190302	0	0	0	0	0	0	0	0	0	0	0	0	0	0	0	0
43	r2-ind9	0	0	0	0	68584.3	0	0	0	0	0	0	0	0	0	0	0	0	0	0	0
44	r2-ind10	0	0	0	0	0	86618.2	0	0	0	0	0	0	0	0	0	0	0	0	0	0
45	r2-ind11	0	0	0	0	0	0	101226	0	0	0	0	0	0	0	0	0	0	0	0	0
46	r2-ind12	0	0	0	0	0	0	0	1.47129e+06	0	0	0	0	0	0	0	0	0	0	0	0
47	LAB r3-FISH+AGR	108475	0	0	0	0	0	0	0	0	0	0	0	0	0	0	0	0	0	0	0
48	r3-ind4	0	532221	0	0	0	0	0	0	0	0	0	0	0	0	0	0	0	0	0	0
49	r3-ind5	0	0	73968.9	0	0	0	0	0	0	0	0	0	0	0	0	0	0	0	0	0
50	r3-MANU (6-8)	0	0	0	844884	0	0	0	0	0	0	0	0	0	0	0	0	0	0	0	0
51	r3-ind9	0	0	0	0	339341	0	0	0	0	0	0	0	0	0	0	0	0	0	0	0
52	r3-ind10	0	0	0	0	0	466882	0	0	0	0	0	0	0	0	0	0	0	0	0	0
53	r3-ind11	0	0	0	0	0	0	466826	0	0	0	0	0	0	0	0	0	0	0	0	0
54	r3-ind12	0	0	0	0	0	0	0	6.48016e+06	0	0	0	0	0	0	0	0	0	0	0	0
55	CAP r1-FISH+AGR	5177.36	0	0	0	0	0	0	0	0	0	0	0	0	0	0	0	0	0	0	0
56	r1-ind4	0	420.306	0	0	0	0	0	0	0	0	0	0	0	0	0	0	0	0	0	0
57	r1-ind5	0	0	521.02	0	0	0	0	0	0	0	0	0	0	0	0	0	0	0	0	0
58	r1-MANU (6-8)	0	0	0	893.456	0	0	0	0	0	0	0	0	0	0	0	0	0	0	0	0
59	r1-ind9	0	0	0	0	5624.41	0	0	0	0	0	0	0	0	0	0	0	0	0	0	0
60	r1-ind10	0	0	0	0	0	1006.91	0	0	0	0	0	0	0	0	0	0	0	0	0	0
61	r1-ind11	0	0	0	0	0	0	697.538	0	0	0	0	0	0	0	0	0	0	0	0	0
62	r1-ind12	0	0	0	0	0	0	0	10891.7	0	0	0	0	0	0	0	0	0	0	0	0
63	CAP r2-FISH+AGR	31413.3	0	0	0	0	0	0	0	0	0	0	0	0	0	0	0	0	0	0	0
64	r2-ind4	0	57044.2	0	0	0	0	0	0	0	0	0	0	0	0	0	0	0	0	0	0
65	r2-ind5	0	0	36483.1	0	0	0	0	0	0	0	0	0	0	0	0	0	0	0	0	0
66	r2-MANU (6-8)	0	0	0	197918	0	0	0	0	0	0	0	0	0	0	0	0	0	0	0	0
67	r2-ind9	0	0	0	0	46198.4	0	0	0	0	0	0	0	0	0	0	0	0	0	0	0
68	r2-ind10	0	0	0	0	0	124621	0	0	0	0	0	0	0	0	0	0	0	0	0	0
69	r2-ind11	0	0	0	0	0	0	90773.2	0	0	0	0	0	0	0	0	0	0	0	0	0
70	r2-ind12	0	0	0	0	0	0	0	1.34106e+06	0	0	0	0	0	0	0	0	0	0	0	0
71	CAP r3-FISH+AGR	289417	0	0	0	0	0	0	0	0	0	0	0	0	0	0	0	0	0	0	0
72	r3-ind4	0	274972	0	0	0	0	0	0	0	0	0	0	0	0	0	0	0	0	0	0
73	r3-ind5	0	0	206033	0	0	0	0	0	0	0	0	0	0	0	0	0	0	0	0	0
74	r3-MANU (6-8)	0	0	0	919965	0	0	0	0	0	0	0	0	0	0	0	0	0	0	0	0
75	r3-ind9	0	0	0	0	238838	0	0	0	0	0	0	0	0	0	0	0	0	0	0	0
76	r3-ind10	0	0	0	0	0	575479	0	0	0	0	0	0	0	0	0	0	0	0	0	0
77	r3-ind11	0	0	0	0	0	0	359135	0	0	0	0	0	0	0	0	0	0	0	0	0
78	r3-ind12	0	0	0	0	0	0	0	5.20284e+06	0	0	0	0	0	0	0	0	0	0	0	0
	SUM	1.74623e-10	3.49246e-10	0	2.56114e-09	5.82077e-11	-3.49246e-10	-1.16415e-10	0	1.45446e+07	7.60127e+06	0	0	1.16415e-10	2.32831e-10	0	-9.31323e-10	0	0	0	0		7.45058e-09

## Sheet: X1-19-aggr
			1	2	3	4	5	6	7	8	9	10	11	12	13	14	15	16	17	18	19	20	21	22	23	24	25	26	27	28	29	30	31	32	33	34	35	36	37	38	39	40	41	42	43	44	45	46	47
	2019		use - R1	use - R1	use - R1	use - R1	use - R1	use - R1	use - R1	use - R1	use - R1	use - R1	use - R1	use - R1	use - R2	use - R2	use - R2	use - R2	use - R2	use - R2	use - R2	use - R2	use - R2	use - R2	use - R2	use - R2	use - R3	use - R3	use - R3	use - R3	use - R3	use - R3	use - R3	use - R3	use - R3	use - R3	use - R3	use - R3	PCE	FDo	PCE	FDo	PCE	FDo	V r1	V r1	V r1	V r1	V r1
			ind1-Ph	ind2-Fi	ind3	ind4	ind5	ind6-m	ind7-m	ind8-m	ind9	ind10	ind11	ind12	ind1-Ph	ind2-Fi	ind3	ind4	ind5	ind6-m	ind7-m	ind8-m	ind9	ind10	ind11	ind12	ind1-Ph	ind2-Fi	ind3	ind4	ind5	ind6-m	ind7-m	ind8-m	ind9	ind10	ind11	ind12	r1	r1	r2	r2	r3	r3	com1	com2	com3	com4	com5
1	V r1	com1	-92.6361	0	0	0	0	0	0	0	0	0	0	0	0	0	0	0	0	0	0	0	0	0	0	0	0	0	0	0	0	0	0	0	0	0	0	0	0	0	0	0	0	0	0	0	0	0	0
2	V r1	com2	0	-1661.47	0	0	0	0	0	0	0	0	0	0	0	0	0	0	0	0	0	0	0	0	0	0	0	0	0	0	0	0	0	0	0	0	0	0	0	0	0	0	0	0	0	0	0	0	0
3	V r1	com3	0	0	-12991.4	0	0	0	0	-1.13144	0	0	0	0	0	0	0	0	0	0	0	0	0	0	0	0	0	0	0	0	0	0	0	0	0	0	0	0	0	0	0	0	0	0	0	0	12992.6	0	0
4	V r1	com4	0	0	0	-5152.65	0	0	0	0	0	0	0	0	0	0	0	0	0	0	0	0	0	0	0	0	0	0	0	0	0	0	0	0	0	0	0	0	0	0	0	0	0	0	0	0	0	5152.65	0
5	V r1	com5	0	0	0	0	-1613.7	0	0	0	0	0	0	-383.792	0	0	0	0	0	0	0	0	0	0	0	0	0	0	0	0	0	0	0	0	0	0	0	0	0	0	0	0	0	0	0	0	0	0	1997.49
6	V r1	com6	0	0	0	0	0	-4249.71	0	0	0	0	0	0	0	0	0	0	0	0	0	0	0	0	0	0	0	0	0	0	0	0	0	0	0	0	0	0	0	0	0	0	0	0	0	0	0	0	0
7	V r1	com7	0	0	0	0	0	-4.5848	-188.736	-0.237721	0	0	0	0	0	0	0	0	0	0	0	0	0	0	0	0	0	0	0	0	0	0	0	0	0	0	0	0	0	0	0	0	0	0	0	0	0	0	0
8	V r1	com8	0	0	-491.539	0	0	0	-0.175032	-3520.3	0	0	0	0	0	0	0	0	0	0	0	0	0	0	0	0	0	0	0	0	0	0	0	0	0	0	0	0	0	0	0	0	0	0	0	0	0	0	0
9	V r1	com9	0	0	0	0	0	0	0	0	-11606.7	0	0	-26.305	0	0	0	0	0	0	0	0	0	0	0	0	0	0	0	0	0	0	0	0	0	0	0	0	0	0	0	0	0	0	0	0	0	0	0
10	V r1	com10	0	0	0	0	0	0	0	0	0	-2546.98	0	0	0	0	0	0	0	0	0	0	0	0	0	0	0	0	0	0	0	0	0	0	0	0	0	0	0	0	0	0	0	0	0	0	0	0	0
11	V r1	com11	0	0	0	0	0	0	0	0	0	0	-4106.28	-68.9529	0	0	0	0	0	0	0	0	0	0	0	0	0	0	0	0	0	0	0	0	0	0	0	0	0	0	0	0	0	0	0	0	0	0	0
12	V r1	com12	0	0	-0.190167	0	-12.2965	0	0	-12.6127	-8.92793	0	0	-52174	0	0	0	0	0	0	0	0	0	0	0	0	0	0	0	0	0	0	0	0	0	0	0	0	0	0	0	0	0	0	0	0	0	0	0
13	V r2	com1	0	0	0	0	0	0	0	0	0	0	0	0	0	0	0	0	0	0	0	0	0	0	0	0	0	0	0	0	0	0	0	0	0	0	0	0	0	0	0	0	0	0	0	0	0	0	0
14	Vr2	com2	0	0	0	0	0	0	0	0	0	0	0	0	0	-506.696	0	0	0	0	0	0	0	0	0	0	0	0	0	0	0	0	0	0	0	0	0	0	0	0	0	0	0	0	0	0	0	0	0
15	Vr2	com3	0	0	0	0	0	0	0	0	0	0	0	0	0	0	-102098	0	0	0	0	-56.8252	0	0	0	0	0	0	0	0	0	0	0	0	0	0	0	0	0	0	0	0	0	0	0	0	0	0	0
16	Vr2	com4	0	0	0	0	0	0	0	0	0	0	0	0	0	0	0	-265155	0	0	0	0	0	0	0	0	0	0	0	0	0	0	0	0	0	0	0	0	0	0	0	0	0	0	0	0	0	0	0
17	Vr2	com5	0	0	0	0	0	0	0	0	0	0	0	0	0	0	0	0	-65285.4	0	0	0	0	0	0	-32655	0	0	0	0	0	0	0	0	0	0	0	0	0	0	0	0	0	0	0	0	0	0	0
18	Vr2	com6	0	0	0	0	0	0	0	0	0	0	0	0	0	0	0	0	0	-3229.79	-197.422	0	0	0	0	0	0	0	0	0	0	0	0	0	0	0	0	0	0	0	0	0	0	0	0	0	0	0	0
19	Vr2	com7	0	0	0	0	0	0	0	0	0	0	0	0	0	0	0	0	0	-18.1854	-97314.8	-230.568	0	0	0	0	0	0	0	0	0	0	0	0	0	0	0	0	0	0	0	0	0	0	0	0	0	0	0
20	Vr2	com8	0	0	0	0	0	0	0	0	0	0	0	0	0	0	-1252.58	0	0	0	-332.773	-754831	0	0	0	0	0	0	0	0	0	0	0	0	0	0	0	0	0	0	0	0	0	0	0	0	0	0	0
21	Vr2	com9	0	0	0	0	0	0	0	0	0	0	0	0	0	0	0	0	0	0	0	0	-191091	0	0	-6216.76	0	0	0	0	0	0	0	0	0	0	0	0	0	0	0	0	0	0	0	0	0	0	0
22	Vr2	com10	0	0	0	0	0	0	0	0	0	0	0	0	0	0	0	0	0	0	0	0	0	-340831	0	0	0	0	0	0	0	0	0	0	0	0	0	0	0	0	0	0	0	0	0	0	0	0	0
23	Vr2	com11	0	0	0	0	0	0	0	0	0	0	0	0	0	0	0	0	0	0	0	0	0	0	-299508	-1044.59	0	0	0	0	0	0	0	0	0	0	0	0	0	0	0	0	0	0	0	0	0	0	0
24	Vr2	com12	0	0	0	0	0	0	0	0	0	0	0	0	0	0	-491.889	0	-435.03	0	0	-6593.87	-544.47	0	0	-4.07287e+06	0	0	0	0	0	0	0	0	0	0	0	0	0	0	0	0	0	0	0	0	0	0	0
25	V r3	com1	0	0	0	0	0	0	0	0	0	0	0	0	0	0	0	0	0	0	0	0	0	0	0	0	0	0	0	0	0	0	0	0	0	0	0	0	0	0	0	0	0	0	0	0	0	0	0
26	V r3	com2	0	0	0	0	0	0	0	0	0	0	0	0	0	0	0	0	0	0	0	0	0	0	0	0	0	-3267.76	0	0	0	0	0	0	0	0	0	0	0	0	0	0	0	0	0	0	0	0	0
27	V r3	com3	0	0	0	0	0	0	0	0	0	0	0	0	0	0	0	0	0	0	0	0	0	0	0	0	0	0	-867081	0	0	0	0	-883.043	0	0	0	0	0	0	0	0	0	0	0	0	0	0	0
28	V r3	com4	0	0	0	0	0	0	0	0	0	0	0	0	0	0	0	0	0	0	0	0	0	0	0	0	0	0	0	-1.51689e+06	0	0	0	0	0	0	0	0	0	0	0	0	0	0	0	0	0	0	0
29	V r3	com5	0	0	0	0	0	0	0	0	0	0	0	0	0	0	0	0	0	0	0	0	0	0	0	0	0	0	0	0	-428255	0	0	0	0	0	0	-128013	0	0	0	0	0	0	0	0	0	0	0
30	V r3	com6	0	0	0	0	0	0	0	0	0	0	0	0	0	0	0	0	0	0	0	0	0	0	0	0	0	0	0	0	0	-6081.2	-256.82	0	0	0	0	0	0	0	0	0	0	0	0	0	0	0	0
31	V r3	com7	0	0	0	0	0	0	0	0	0	0	0	0	0	0	0	0	0	0	0	0	0	0	0	0	0	0	0	0	0	-60.7604	-641658	-1123.09	0	0	0	0	0	0	0	0	0	0	0	0	0	0	0
32	V r3	com8	0	0	0	0	0	0	0	0	0	0	0	0	0	0	0	0	0	0	0	0	0	0	0	0	0	0	-21437.9	0	0	0	-6265.19	-4.48049e+06	0	0	0	0	0	0	0	0	0	0	0	0	0	0	0
33	V r3	com9	0	0	0	0	0	0	0	0	0	0	0	0	0	0	0	0	0	0	0	0	0	0	0	0	0	0	0	0	0	0	0	0	-1.15018e+06	0	0	-26497.9	0	0	0	0	0	0	0	0	0	0	0
34	V r3	com10	0	0	0	0	0	0	0	0	0	0	0	0	0	0	0	0	0	0	0	0	0	0	0	0	0	0	0	0	0	0	0	0	0	-1.725e+06	0	0	0	0	0	0	0	0	0	0	0	0	0
35	V r3	com11	0	0	0	0	0	0	0	0	0	0	0	0	0	0	0	0	0	0	0	0	0	0	0	0	0	0	0	0	0	0	0	0	0	0	-1.4764e+06	-4386.46	0	0	0	0	0	0	0	0	0	0	0
36	V r3	com12	0	0	0	0	0	0	0	0	0	0	0	0	0	0	0	0	0	0	0	0	0	0	0	0	0	0	-1914.92	0	-1676.67	0	0	-19364.5	-3422.6	0	0	-1.89681e+07	0	0	0	0	0	0	0	0	0	0	0
37	r1	com1	0	0	0	0	0	92.6361	0	0	0	0	0	0	0	0	0	0	0	0	0	0	0	0	0	0	0	0	0	0	0	0	0	0	0	0	0	0	0	0	0	0	0	0	0	0	0	0	0
38	r1	com2	0	0	0	0	0	1661.47	0	0	0	0	0	0	0	0	0	0	0	0	0	0	0	0	0	0	0	0	0	0	0	0	0	0	0	0	0	0	0	0	0	0	0	0	0	0	0	0	0
39	r1	com3	0.066248	0.581793	1003.95	53.5095	79.15	95.919	21.8409	1197.05	1.20835	0.0439891	3.25211	76.3706	0	0	143.299	28.5858	31.6932	3.07007	179.87	500.832	0.165961	0.0948221	3.12424	65.4094	0	0	1247.71	177.844	215.915	3.01657	1250.83	2326.46	1.1215	0.419636	15.7582	316.082	108.722	376.784	122.199	190.656	498.189	1035.21	0	0	-12992.6	0	0
40	r1	com4	0	0.501884	67.5175	0.764428	38.5376	2.78755	0.397632	22.732	33.2697	2.26703	10.5342	681.28	0	1.97737e-05	0.0316174	0.00220062	0.0565927	0.000528098	0.0166756	0.149142	0.0578019	0.0268071	0.0537968	3.54007	0	0.000386682	0.377273	0.0151169	0.487023	0.000578366	0.0998181	0.869513	0.413161	0.132232	0.303024	17.9627	0	4149.02	0	19.4497	0	98.9872	0	0	0	-5152.65	0
41	r1	com5	0	13.4539	132.89	14.2837	84.9274	70.2799	1.47454	23.5705	53.8639	14.8954	69.5905	399.331	0	0	1.3779	0.580608	1.09356	0.0282206	0.952629	5.07912	1.5531	2.4748	4.83845	32.3553	0	0	9.07662	3.15463	16.1749	0.0243109	4.82544	32.779	8.03065	9.60223	21.4181	133.917	557.752	0	49.3696	0	181.694	0	0	0	0	0	-1997.49
42	r1	com6	0.439456	4.17961	0	0	0	28.5812	0.0603905	0	0.0117603	0	0	7.96128	0	0	0	0	0	11.8673	2.89817	0	0.0268202	0	0	111.314	0	0	0	0	0	17.3353	30.9453	0	0.206332	0	0	945.968	4.06859	3.01987	73.5131	25.1631	442.105	153.75	0	0	0	0	0
43	r1	com7	0.0798702	0.574778	0.115206	0	0	2.66706	2.23035	2.36909	0.0341843	0.143977	0.0283772	18.8663	0	0	0.606303	0	0	0.00180263	2.62926	0.480657	0.000755406	0.0511579	0.0048896	2.67142	0	0	4.20034	0	0	0.00191932	14.7299	2.72721	0.00443091	0.245331	0.0251772	15.7602	51.819	6.05449	9.59839	0.679243	42.5197	3.01728	0	0	0	0	0
44	r1	com8	3.75356	61.9957	288.932	270.054	8.29375	54.8145	3.43676	111.864	110.616	13.1013	20.2328	432.627	0	0.00805709	2.2355	12.3494	0.248712	0.0206684	1.85144	46.3606	2.91156	2.44707	1.57187	32.833	0	0.145584	18.0886	79.1368	2.52312	0.0209153	9.20948	315.807	19.1305	11.1532	8.25886	165.571	547.468	565.867	52.8849	36.3091	220.073	159.084	0	0	0	0	0
45	r1	com9	0.299424	76.6227	231.603	115.475	129.427	134.455	10.4657	182.365	854.156	98.098	209.361	580.62	0	0.183017	13.216	22.1903	19.9111	1.08625	35.9595	98.0637	112.63	76.5667	64.1178	232.423	0	3.47898	148.012	149.23	127.849	1.15641	230.238	717.369	703.27	367.131	356.626	1162.21	869.245	245.887	348.717	51.7789	1471.49	242.053	0	0	0	0	0
46	r1	com10	6.76133	92.4935	292.715	145.192	14.0089	81.3332	8.27156	89.6981	67.696	31.6894	35.4724	352.808	0	0.000510476	0.241962	0.398286	0.0288536	0.00699282	0.387933	1.55815	0.117981	0.356135	0.17043	1.49509	0	0.0094811	1.6575	2.61966	0.187631	0.00727375	1.98686	9.75578	0.806581	1.66847	0.917035	7.81345	677.705	493.592	3.97534	1.91419	16.9234	10.8628	0	0	0	0	0
47	r1	com11	12.8601	177.915	13.9735	245.742	7.15739	62.9774	0.159342	9.05844	33.5758	1.1182	17.2215	114.46	0	0.000334431	0.0282391	2.12183	0.0269553	0.00100168	0.0339939	0.423704	0.299181	0.0388918	0.249385	1.50716	0	0.00645142	0.353617	14.8346	0.293055	0.00108218	0.170612	3.83691	2.07339	0.189246	1.42035	8.26718	2917.65	217.511	52.9672	3.18959	234.199	17.3282	0	0	0	0	0
48	r1	com12	13.0574	238.443	1612.34	434.67	202.274	243.96	16.3137	175.862	1425.32	496.659	993.515	10565.7	0	0.00363676	2.17233	4.10858	1.4259	0.0599192	1.40104	13.1737	7.91958	19.2744	16.0371	198.287	0	0.0741965	27.0219	29.5813	10.0807	0.0684632	7.96933	79.8881	57.5002	99.1907	95.0082	1101.91	17206.7	13128.3	346.921	148.852	1632.97	725.324	0	0	0	0	0
49	r2	com1	0	0	0	0	0	0	0	0	0	0	0	0	0	0	0	0	0	0	0	0	0	0	0	0	0	0	0	0	0	0	0	0	0	0	0	0	0	0	0	0	0	0	0	0	0	0	0
50	r2	com2	0	0	0	0	0	0	0	0	0	0	0	0	0	0	0	0	0	506.696	0	0	0	0	0	0	0	0	0	0	0	0	0	0	0	0	0	0	0	0	0	0	0	0	0	0	0	0	0
51	r2	com3	0.00505981	0.0444355	76.6788	4.08688	6.04523	7.32599	1.66814	91.4271	0.0922897	0.00335975	0.248386	5.83294	0	0	5643.56	1125.8	1248.18	120.909	7083.85	19724.3	6.53607	3.73439	123.042	2576.02	0	0	5349.77	762.536	925.772	12.9341	5363.14	9975.08	4.80864	1.79926	67.566	1355.26	8.30383	28.7776	4812.56	7508.61	2136.07	4438.65	0	0	0	0	0
52	r2	com4	0	0.000710421	0.0955716	0.00108206	0.0545504	0.00394581	0.000562851	0.0321774	0.0470935	0.003209	0.0149113	0.964358	0	0.224141	358.394	24.9448	641.496	5.98617	189.024	1690.57	655.203	303.868	609.804	40127.8	0	0.00023135	0.225721	0.00904436	0.291384	0.000346034	0.0597207	0.520226	0.247192	0.0791137	0.181298	10.747	0	5.87298	0	220468	0	59.2237	0	0	0	0	0
53	r2	com5	0	1.98007	19.5579	2.10219	12.4991	10.3434	0.217014	3.46897	7.92736	2.19221	10.2419	58.7712	0	0	878.751	370.28	697.414	17.9976	607.535	3239.19	990.482	1578.29	3085.7	20634.4	0	0	697.905	242.561	1243.69	1.86928	371.03	2520.39	617.481	738.32	1646.85	10297	82.0866	0	31485.2	0	13970.6	0	0	0	0	0	0
54	r2	com6	0.0532374	0.506334	0	0	0	3.46243	0.00731593	0	0.00142468	0	0	0.964459	0	0	0	0	0	44.1916	10.7923	0	0.0998737	0	0	414.515	0	0	0	0	0	11.9745	21.3756	0	0.142525	0	0	653.433	0.492884	0.365839	273.75	93.703	305.387	106.204	0	0	0	0	0
55	r2	com7	0.238291	1.71484	0.343714	0	0	7.95713	6.65422	7.06815	0.101988	0.429553	0.084663	56.2873	0	0	2031.33	0	0	6.03945	8808.97	1610.37	2.53088	171.397	16.3819	8950.22	0	0	1504.08	0	0	0.687279	5274.55	976.57	1.58664	87.8492	9.01554	5643.48	154.601	18.0635	32158	2275.71	15225.6	1080.44	0	0	0	0	0
56	r2	com8	3.5432	58.5214	272.74	254.92	7.82895	51.7427	3.24416	105.595	104.417	12.3671	19.099	408.382	0	14.779	4100.54	22652.2	456.209	37.9118	3396.06	85038.6	5340.62	4488.62	2883.26	60225.1	0	38.0193	4723.86	20666.6	658.914	5.46204	2405.06	82473.3	4995.95	2912.67	2156.81	43239.1	516.788	534.155	97006	66601.3	57472.1	41544.9	0	0	0	0	0
57	r2	com9	0.0090944	2.32726	7.03447	3.50732	3.93107	4.0838	0.317875	5.53896	25.9432	2.97953	6.3589	17.6351	0	28.4083	2051.42	3444.42	3090.64	168.61	5581.71	15221.7	17482.6	11884.9	9952.5	36077.2	0	6.48859	276.054	278.326	238.45	2.1568	429.414	1337.95	1311.66	684.729	665.137	2167.61	26.4015	7.46831	54128.6	8037.24	2744.44	451.449	0	0	0	0	0
58	r2	com10	1.3101	17.9219	56.7176	28.133	2.71443	15.7595	1.60273	17.3803	13.1171	6.14028	6.87329	68.3617	0	12.9405	6133.71	10096.5	731.436	177.267	9834.06	39499.1	2990.81	9027.99	4320.38	37900.3	0	5.66517	990.392	1565.3	112.113	4.34622	1187.19	5829.29	481.95	996.948	547.948	4668.71	131.315	95.6406	100775	48524.5	10112.1	6490.73	0	0	0	0	0
59	r2	com11	1.30899	18.1093	1.42231	25.0132	0.728528	6.41027	0.0162189	0.92203	3.41757	0.113817	1.75293	11.6506	0	1.47846	124.84	9380.22	119.165	4.42824	150.281	1873.12	1322.63	171.934	1102.49	6662.88	0	0.706504	38.7251	1624.56	32.0929	0.118511	18.684	420.186	227.061	20.7246	155.545	905.351	296.978	22.1397	234159	14100.6	25647.5	1897.64	0	0	0	0	0
60	r2	com12	1.23497	22.552	152.495	41.1112	19.1312	23.0738	1.54295	16.633	134.807	46.9741	93.9669	999.309	0	16.065	9596.01	18149.2	6298.74	264.686	6188.95	58193.5	34983.9	85142.7	70842.2	875911	0	10.9695	3995.02	4373.42	1490.36	10.1219	1178.22	11811	8501.05	14664.7	14046.4	162911	1627.42	1241.67	1.53249e+06	657538	241424	107235	0	0	0	0	0
61	r3	com1	0	0	0	0	0	0	0	0	0	0	0	0	0	0	0	0	0	0	0	0	0	0	0	0	0	0	0	0	0	0	0	0	0	0	0	0	0	0	0	0	0	0	0	0	0	0	0
62	r3	com2	0	0	0	0	0	0	0	0	0	0	0	0	0	0	0	0	0	0	0	0	0	0	0	0	0	0	0	0	0	3267.76	0	0	0	0	0	0	0	0	0	0	0	0	0	0	0	0	0
63	r3	com3	0.0108211	0.0950311	163.988	8.74033	12.9285	15.6676	3.56753	195.529	0.197374	0.00718525	0.531206	12.4745	0	0	4427.25	883.164	979.167	94.8503	5557.13	15473.3	5.1274	2.92954	96.5239	2020.83	0	0	124783	17786.2	21593.6	301.688	125095	232669	112.162	41.9678	1575.98	31611.4	17.7588	61.5446	3775.35	5890.34	49823.9	103531	0	0	0	0	0
64	r3	com4	0	0.0133783	1.79976	0.0203767	1.02727	0.0743055	0.0105993	0.605948	0.886843	0.0604303	0.280802	18.1603	0	0.00816082	13.0489	0.908222	23.3564	0.217952	6.88222	61.5524	23.8555	11.0636	22.2025	1461.03	0	4.87038	4751.87	190.402	6134.2	7.2847	1257.24	10951.8	5203.88	1665.5	3816.68	226246	0	110.597	0	8027.09	0	1.24677e+06	0	0	0	0	0
65	r3	com5	0	1.4456	14.2788	1.53476	9.1253	7.55145	0.158436	2.53261	5.78757	1.60048	7.47737	42.9075	0	0	404.819	170.579	321.282	8.29105	279.877	1492.22	456.291	727.081	1421.51	9505.79	0	0	11311.5	3931.38	20157.5	30.2969	6013.58	40850	10008	11966.5	26691.8	166891	59.9295	0	14504.5	0	226432	0	0	0	0	0	0
66	r3	com6	0.216834	2.06228	0	0	0	14.1023	0.0297975	0	0.00580268	0	0	3.9282	0	0	0	0	0	0.996791	0.243432	0	0.00225276	0	0	9.34984	0	0	0	0	0	48.5744	86.7103	0	0.578155	0	0	2650.65	2.0075	1.49005	6.17473	2.11358	1238.8	430.816	0	0	0	0	0
67	r3	com7	1.30528	9.3933	1.88275	0	0	43.5864	36.4495	38.7169	0.558658	2.35294	0.463755	308.322	0	0	1427.18	0	0	4.24321	6189.03	1131.42	1.77815	120.421	11.5096	6288.27	0	0	28082.2	0	0	12.832	98479.8	18233.3	29.6238	1640.21	168.327	105368	846.852	98.9454	22593.7	1598.87	284274	20172.6	0	0	0	0	0
68	r3	com8	10.6991	176.712	823.568	769.758	23.6404	156.243	9.7961	318.856	315.299	37.3438	57.6714	1233.15	0	7.88955	2189.01	12092.6	243.54	20.2386	1812.94	45396.6	2851.01	2396.18	1539.18	32150.3	0	513.377	63786.6	279063	8897.37	73.7543	32475.7	1.11364e+06	67460.7	39330	29123.5	583860	1560.5	1612.94	51785.2	35554.1	776050	560983	0	0	0	0	0
69	r3	com9	0.0353008	9.03349	27.305	13.614	15.2588	15.8517	1.23386	21.5	100.701	11.5653	24.6827	68.4526	0	2.72237	196.588	330.079	296.177	16.1579	534.896	1458.69	1675.36	1138.93	953.75	3457.29	0	650.34	27668.4	27896.1	23899.4	216.172	43039.3	134101	131465	68629.2	66665.4	217256	102.48	28.989	5187.16	770.21	275070	45247.9	0	0	0	0	0
70	r3	com10	7.2329	98.9445	313.13	155.319	14.986	87.0058	8.84847	95.9541	72.4175	33.8996	37.9465	377.415	0	0.00414195	1.96326	3.23166	0.234115	0.0567391	3.14765	12.6427	0.957287	2.88965	1.38285	12.131	0	269.331	47084.7	74416.9	5330.04	206.626	56440.8	277133	22912.6	47396.4	26050.3	221957	724.972	528.018	32.2556	15.5315	480746	308579	0	0	0	0	0
71	r3	com11	2.16646	29.9722	2.35402	41.3986	1.20576	10.6094	0.0268434	1.52602	5.65631	0.188375	2.90121	19.2824	0	0.0348285	2.9409	220.972	2.80719	0.104317	3.54021	44.1256	31.1574	4.05029	25.9716	156.959	0	33.6006	1841.73	77262.5	1526.31	5.63626	888.594	19983.6	10798.8	985.643	7397.56	43057.6	491.518	36.6427	5516.14	332.171	1.21977e+06	90249.8	0	0	0	0	0
72	r3	com12	4.90681	89.6042	605.899	163.344	76.0125	91.6775	6.13051	66.0869	535.62	186.639	373.352	3970.49	0	1.39857	835.401	1580.02	548.35	23.0428	538.792	5066.16	3045.6	7412.28	6167.32	76254.3	0	346.809	126305	138269	47119	320.01	37250.2	373412	268767	463637	444087	5.15055e+06	6466.1	4933.46	133414	57243.4	7.6328e+06	3.3903e+06	0	0	0	0	0
73	IM-r1	com1	0	0	0	0	0	0	0	0	0	0	0	0	0	0	0	0	0	0	0	0	0	0	0	0	0	0	0	0	0	0	0	0	0	0	0	0	0	0	0	0	0	0	0	0	0	0	0
74	IM-r1	com2	0	0	0	0	0	0	0	0	0	0	0	0	0	0	0	0	0	0	0	0	0	0	0	0	0	0	0	0	0	0	0	0	0	0	0	0	0	0	0	0	0	0	0	0	0	0	0
75	IM-r1	com3	0.000299283	0.00262832	4.53548	0.105876	0.539684	2.80863	0.63953	35.0513	0.0264787	0.000598985	0.128015	1.66271	0	0	0	0	0	0	0	0	0	0	0	0	0	0	0	0	0	0	0	0	0	0	0	0	3.42148	0.312552	0	0	0	0	0	0	0	0	0
76	IM-r1	com4	0	0	0	0	0	0	0	0	0	0	0	0	0	0	0	0	0	0	0	0	0	0	0	0	0	0	0	0	0	0	0	0	0	0	0	0	0	0	0	0	0	0	0	0	0	0	0
77	IM-r1	com5	0	0.0772797	0.763322	0.14584	0.67265	0.601192	0.0126136	0.201628	0.940353	0.177653	0.851611	3.56797	0	0	0	0	0	0	0	0	0	0	0	0	0	0	0	0	0	0	0	0	0	0	0	0	3.64646	0.0155599	0	0	0	0	0	0	0	0	0
78	IM-r1	com6	0.0614738	0.58467	0	0	0	4.02257	0.00849947	0	0.00111602	0	0	1.01076	0	0	0	0	0	0	0	0	0	0	0	0	0	0	0	0	0	0	0	0	0	0	0	0	0.837374	0.637939	0	0	0	0	0	0	0	0	0
79	IM-r1	com7	0.00589455	0.0424196	0.00850237	0	0	0.198038	0.165611	0.175913	0.00171149	0.00856227	0.00251964	1.26371	0	0	0	0	0	0	0	0	0	0	0	0	0	0	0	0	0	0	0	0	0	0	0	0	5.62674	0.674776	0	0	0	0	0	0	0	0	0
80	IM-r1	com8	2.69366	44.4898	207.345	95.4315	11.6268	39.5771	2.4814	80.7679	53.8516	7.57606	17.4686	281.777	0	0	0	0	0	0	0	0	0	0	0	0	0	0	0	0	0	0	0	0	0	0	0	0	578.042	613.239	0	0	0	0	0	0	0	0	0
81	IM-r1	com9	0.00166104	0.425061	1.28481	0.506462	1.51952	2.12412	0.165337	2.881	1.13661	3.18031	0.356881	70.3639	0	0	0	0	0	0	0	0	0	0	0	0	0	0	0	0	0	0	0	0	0	0	0	0	151.022	0.0279641	0	0	0	0	0	0	0	0	0
82	IM-r1	com10	0	0	0	0	0	0	0	0	0	0	0	0	0	0	0	0	0	0	0	0	0	0	0	0	0	0	0	0	0	0	0	0	0	0	0	0	0	0	0	0	0	0	0	0	0	0	0
83	IM-r1	com11	0	0	0	0	0	0	0	0	0	0	0	0	0	0	0	0	0	0	0	0	0	0	0	0	0	0	0	0	0	0	0	0	0	0	0	0	0	0	0	0	0	0	0	0	0	0	0
84	IM-r1	com12	0.411732	7.51872	50.8412	10.8428	5.04277	15.7154	1.05089	11.3286	109.885	12.3211	19.992	386.721	0	0	0	0	0	0	0	0	0	0	0	0	0	0	0	0	0	0	0	0	0	0	0	0	289.758	178.494	0	0	0	0	0	0	0	0	0
85	IM-r2	com1	0	0	0	0	0	0	0	0	0	0	0	0	0	0	0	0	0	0	0	0	0	0	0	0	0	0	0	0	0	0	0	0	0	0	0	0	0	0	0	0	0	0	0	0	0	0	0
86	IM-r2	com2	0	0	0	0	0	0	0	0	0	0	0	0	0	0	0	0	0	0	0	0	0	0	0	0	0	0	0	0	0	0	0	0	0	0	0	0	0	0	0	0	0	0	0	0	0	0	0
87	IM-r2	com3	0	0	0	0	0	0	0	0	0	0	0	0	0	0	1028.2	89.8349	343.226	142.779	8365.18	23292.1	5.77613	2.05072	195.328	2261.81	0	0	0	0	0	0	0	0	0	0	0	0	0	0	6107.85	251.191	0	0	0	0	0	0	0
88	IM-r2	com4	0	0	0	0	0	0	0	0	0	0	0	0	0	0	0	0	0	0	0	0	0	0	0	0	0	0	0	0	0	0	0	0	0	0	0	0	0	0	0	0	0	0	0	0	0	0	0
89	IM-r2	com5	0	0	0	0	0	0	0	0	0	0	0	0	0	0	7.80482	5.84585	8.54107	0.238055	8.0359	42.8449	26.7375	29.1064	58.3884	285.076	0	0	0	0	0	0	0	0	0	0	0	0	0	0	318.287	0.818301	0	0	0	0	0	0	0
90	IM-r2	com6	0	0	0	0	0	0	0	0	0	0	0	0	0	0	0	0	0	317.959	77.6505	0	0.484524	0	0	2690.39	0	0	0	0	0	0	0	0	0	0	0	0	0	0	2880.3	1011.93	0	0	0	0	0	0	0
91	IM-r2	com7	0	0	0	0	0	0	0	0	0	0	0	0	0	0	469.538	0	0	1.40455	2048.64	374.512	0.396865	31.9245	4.55572	1877.66	0	0	0	0	0	0	0	0	0	0	0	0	0	0	10936.6	794.37	0	0	0	0	0	0	0
92	IM-r2	com8	0	0	0	0	0	0	0	0	0	0	0	0	0	13.5975	3772.73	10262.8	819.95	35.0943	3143.68	78718.9	3333.4	3327.8	3191.54	50290.4	0	0	0	0	0	0	0	0	0	0	0	0	0	0	131315	92536.5	0	0	0	0	0	0	0
93	IM-r2	com9	0	0	0	0	0	0	0	0	0	0	0	0	0	0.146266	10.5621	14.021	33.6771	2.47223	81.8414	223.186	21.5916	357.607	15.7458	4057.84	0	0	0	0	0	0	0	0	0	0	0	0	0	0	8728.27	0.848352	0	0	0	0	0	0	0
94	IM-r2	com10	0	0	0	0	0	0	0	0	0	0	0	0	0	0	0	0	0	0	0	0	0	0	0	0	0	0	0	0	0	0	0	0	0	0	0	0	0	0	0	0	0	0	0	0	0	0	0
95	IM-r2	com11	0	0	0	0	0	0	0	0	0	0	0	0	0	0	0	0	0	0	0	0	0	0	0	0	0	0	0	0	0	0	0	0	0	0	0	0	0	0	0	0	0	0	0	0	0	0	0
96	IM-r2	com12	0	0	0	0	0	0	0	0	0	0	0	0	0	0.276571	165.203	247.175	85.7332	9.30904	217.666	2046.67	1472.53	1153.2	778.288	17503.5	0	0	0	0	0	0	0	0	0	0	0	0	0	0	14089.7	4880.93	0	0	0	0	0	0	0
97	IM-r3	com1	0	0	0	0	0	0	0	0	0	0	0	0	0	0	0	0	0	0	0	0	0	0	0	0	0	0	0	0	0	0	0	0	0	0	0	0	0	0	0	0	0	0	0	0	0	0	0
98	IM-r3	com2	0	0	0	0	0	0	0	0	0	0	0	0	0	0	0	0	0	0	0	0	0	0	0	0	0	0	0	0	0	0	0	0	0	0	0	0	0	0	0	0	0	0	0	0	0	0	0
99	IM-r3	com3	0	0	0	0	0	0	0	0	0	0	0	0	0	0	0	0	0	0	0	0	0	0	0	0	0	0	6033.98	376.693	1575.98	94.5551	39207.4	72923.2	26.3079	6.1168	664.022	7366.66	0	0	0	0	16783.1	919.26	0	0	0	0	0
100	IM-r3	com4	0	0	0	0	0	0	0	0	0	0	0	0	0	0	0	0	0	0	0	0	0	0	0	0	0	0	0	0	0	0	0	0	0	0	0	0	0	0	0	0	0	0	0	0	0	0	0
101	IM-r3	com5	0	0	0	0	0	0	0	0	0	0	0	0	0	0	0	0	0	0	0	0	0	0	0	0	0	0	19.4463	12.0139	47.7836	0.0775677	15.3963	104.586	52.2928	42.7159	97.762	446.294	0	0	0	0	443.067	1.16614	0	0	0	0	0
102	IM-r3	com6	0	0	0	0	0	0	0	0	0	0	0	0	0	0	0	0	0	0	0	0	0	0	0	0	0	0	0	0	0	149.185	266.311	0	1.19728	0	0	7343.7	0	0	0	0	5563.82	1985.99	0	0	0	0	0
103	IM-r3	com7	0	0	0	0	0	0	0	0	0	0	0	0	0	0	0	0	0	0	0	0	0	0	0	0	0	0	2255.63	0	0	1.037	7958.53	1473.5	1.6142	106.161	16.2664	7681.36	0	0	0	0	33595	2446.89	0	0	0	0	0
104	IM-r3	com8	0	0	0	0	0	0	0	0	0	0	0	0	0	0	0	0	0	0	0	0	0	0	0	0	0	211.805	26316.6	56694.9	7170.85	30.6151	13480.5	462269	18881.3	13075.4	14455.9	218626	0	0	0	0	471076	349515	0	0	0	0	0
105	IM-r3	com9	0	0	0	0	0	0	0	0	0	0	0	0	0	0	0	0	0	0	0	0	0	0	0	0	0	1.48888	63.3435	50.4926	115.796	1.40938	280.603	874.295	72.1955	918.212	46.8981	10865.6	0	0	0	0	19722.7	2.12368	0	0	0	0	0
106	IM-r3	com10	0	0	0	0	0	0	0	0	0	0	0	0	0	0	0	0	0	0	0	0	0	0	0	0	0	0	0	0	0	0	0	0	0	0	0	0	0	0	0	0	0	0	0	0	0	0	0
107	IM-r3	com11	0	0	0	0	0	0	0	0	0	0	0	0	0	0	0	0	0	0	0	0	0	0	0	0	0	0	0	0	0	0	0	0	0	0	0	0	0	0	0	0	0	0	0	0	0	0	0
108	IM-r3	com12	0	0	0	0	0	0	0	0	0	0	0	0	0	0	0	0	0	0	0	0	0	0	0	0	0	11.9793	4362.79	3778.23	1286.79	22.5815	2628.56	26349.8	22698	12599.5	9788.85	206507	0	0	0	0	140801	50493.6	0	0	0	0	0
109	r1 LAB	ind1	8.61493	0	0	0	0	0	0	0	0	0	0	0	0	0	0	0	0	0	0	0	0	0	0	0	0	0	0	0	0	0	0	0	0	0	0	0	0	0	0	0	0	0	0	0	0	0	0
110	r1 LAB	ind2	0	195.902	0	0	0	0	0	0	0	0	0	0	0	0	0	0	0	0	0	0	0	0	0	0	0	0	0	0	0	0	0	0	0	0	0	0	0	0	0	0	0	0	0	0	0	0	0
111	r1 LAB	ind3	0	0	2069.68	0	0	0	0	0	0	0	0	0	0	0	0	0	0	0	0	0	0	0	0	0	0	0	0	0	0	0	0	0	0	0	0	0	0	0	0	0	0	0	0	0	0	0	0
112	r1 LAB	ind4	0	0	0	1833.02	0	0	0	0	0	0	0	0	0	0	0	0	0	0	0	0	0	0	0	0	0	0	0	0	0	0	0	0	0	0	0	0	0	0	0	0	0	0	0	0	0	0	0
113	r1 LAB	ind5	0	0	0	0	314.681	0	0	0	0	0	0	0	0	0	0	0	0	0	0	0	0	0	0	0	0	0	0	0	0	0	0	0	0	0	0	0	0	0	0	0	0	0	0	0	0	0	0
114	r1 LAB	ind6	0	0	0	0	0	591.362	0	0	0	0	0	0	0	0	0	0	0	0	0	0	0	0	0	0	0	0	0	0	0	0	0	0	0	0	0	0	0	0	0	0	0	0	0	0	0	0	0
115	r1 LAB	ind7	0	0	0	0	0	0	22.2099	0	0	0	0	0	0	0	0	0	0	0	0	0	0	0	0	0	0	0	0	0	0	0	0	0	0	0	0	0	0	0	0	0	0	0	0	0	0	0	0
116	r1 LAB	ind8	0	0	0	0	0	0	0	215.955	0	0	0	0	0	0	0	0	0	0	0	0	0	0	0	0	0	0	0	0	0	0	0	0	0	0	0	0	0	0	0	0	0	0	0	0	0	0	0
117	r1 LAB	ind9	0	0	0	0	0	0	0	0	1918.62	0	0	0	0	0	0	0	0	0	0	0	0	0	0	0	0	0	0	0	0	0	0	0	0	0	0	0	0	0	0	0	0	0	0	0	0	0	0
118	r1 LAB	ind10	0	0	0	0	0	0	0	0	0	513.928	0	0	0	0	0	0	0	0	0	0	0	0	0	0	0	0	0	0	0	0	0	0	0	0	0	0	0	0	0	0	0	0	0	0	0	0	0
119	r1 LAB	ind11	0	0	0	0	0	0	0	0	0	0	1366.79	0	0	0	0	0	0	0	0	0	0	0	0	0	0	0	0	0	0	0	0	0	0	0	0	0	0	0	0	0	0	0	0	0	0	0	0
120	r1 LAB	ind12	0	0	0	0	0	0	0	0	0	0	0	20102.3	0	0	0	0	0	0	0	0	0	0	0	0	0	0	0	0	0	0	0	0	0	0	0	0	0	0	0	0	0	0	0	0	0	0	0
121	r2 LAB	ind1	0	0	0	0	0	0	0	0	0	0	0	0	0	0	0	0	0	0	0	0	0	0	0	0	0	0	0	0	0	0	0	0	0	0	0	0	0	0	0	0	0	0	0	0	0	0	0
122	r2 LAB	ind2	0	0	0	0	0	0	0	0	0	0	0	0	0	186.964	0	0	0	0	0	0	0	0	0	0	0	0	0	0	0	0	0	0	0	0	0	0	0	0	0	0	0	0	0	0	0	0	0
123	r2 LAB	ind3	0	0	0	0	0	0	0	0	0	0	0	0	0	0	26615.1	0	0	0	0	0	0	0	0	0	0	0	0	0	0	0	0	0	0	0	0	0	0	0	0	0	0	0	0	0	0	0	0
124	r2 LAB	ind4	0	0	0	0	0	0	0	0	0	0	0	0	0	0	0	116895	0	0	0	0	0	0	0	0	0	0	0	0	0	0	0	0	0	0	0	0	0	0	0	0	0	0	0	0	0	0	0
125	r2 LAB	ind5	0	0	0	0	0	0	0	0	0	0	0	0	0	0	0	0	12193.6	0	0	0	0	0	0	0	0	0	0	0	0	0	0	0	0	0	0	0	0	0	0	0	0	0	0	0	0	0	0
126	r2 LAB	ind6	0	0	0	0	0	0	0	0	0	0	0	0	0	0	0	0	0	833.911	0	0	0	0	0	0	0	0	0	0	0	0	0	0	0	0	0	0	0	0	0	0	0	0	0	0	0	0	0
127	r2 LAB	ind7	0	0	0	0	0	0	0	0	0	0	0	0	0	0	0	0	0	0	15371.4	0	0	0	0	0	0	0	0	0	0	0	0	0	0	0	0	0	0	0	0	0	0	0	0	0	0	0	0
128	r2 LAB	ind8	0	0	0	0	0	0	0	0	0	0	0	0	0	0	0	0	0	0	0	174096	0	0	0	0	0	0	0	0	0	0	0	0	0	0	0	0	0	0	0	0	0	0	0	0	0	0	0
129	r2 LAB	ind9	0	0	0	0	0	0	0	0	0	0	0	0	0	0	0	0	0	0	0	0	68584.3	0	0	0	0	0	0	0	0	0	0	0	0	0	0	0	0	0	0	0	0	0	0	0	0	0	0
130	r2 LAB	ind10	0	0	0	0	0	0	0	0	0	0	0	0	0	0	0	0	0	0	0	0	0	86618.2	0	0	0	0	0	0	0	0	0	0	0	0	0	0	0	0	0	0	0	0	0	0	0	0	0
131	r2 LAB	ind11	0	0	0	0	0	0	0	0	0	0	0	0	0	0	0	0	0	0	0	0	0	0	101226	0	0	0	0	0	0	0	0	0	0	0	0	0	0	0	0	0	0	0	0	0	0	0	0
132	r2 LAB	ind12	0	0	0	0	0	0	0	0	0	0	0	0	0	0	0	0	0	0	0	0	0	0	0	1.47129e+06	0	0	0	0	0	0	0	0	0	0	0	0	0	0	0	0	0	0	0	0	0	0	0
133	r3 LAB	ind1	0	0	0	0	0	0	0	0	0	0	0	0	0	0	0	0	0	0	0	0	0	0	0	0	0	0	0	0	0	0	0	0	0	0	0	0	0	0	0	0	0	0	0	0	0	0	0
134	r3 LAB	ind2	0	0	0	0	0	0	0	0	0	0	0	0	0	0	0	0	0	0	0	0	0	0	0	0	0	425.842	0	0	0	0	0	0	0	0	0	0	0	0	0	0	0	0	0	0	0	0	0
135	r3 LAB	ind3	0	0	0	0	0	0	0	0	0	0	0	0	0	0	0	0	0	0	0	0	0	0	0	0	0	0	108049	0	0	0	0	0	0	0	0	0	0	0	0	0	0	0	0	0	0	0	0
136	r3 LAB	ind4	0	0	0	0	0	0	0	0	0	0	0	0	0	0	0	0	0	0	0	0	0	0	0	0	0	0	0	532221	0	0	0	0	0	0	0	0	0	0	0	0	0	0	0	0	0	0	0
137	r3 LAB	ind5	0	0	0	0	0	0	0	0	0	0	0	0	0	0	0	0	0	0	0	0	0	0	0	0	0	0	0	0	73968.9	0	0	0	0	0	0	0	0	0	0	0	0	0	0	0	0	0	0
138	r3 LAB	ind6	0	0	0	0	0	0	0	0	0	0	0	0	0	0	0	0	0	0	0	0	0	0	0	0	0	0	0	0	0	742.396	0	0	0	0	0	0	0	0	0	0	0	0	0	0	0	0	0
139	r3 LAB	ind7	0	0	0	0	0	0	0	0	0	0	0	0	0	0	0	0	0	0	0	0	0	0	0	0	0	0	0	0	0	0	80717.9	0	0	0	0	0	0	0	0	0	0	0	0	0	0	0	0
140	r3 LAB	ind8	0	0	0	0	0	0	0	0	0	0	0	0	0	0	0	0	0	0	0	0	0	0	0	0	0	0	0	0	0	0	0	763424	0	0	0	0	0	0	0	0	0	0	0	0	0	0	0
141	r3 LAB	ind9	0	0	0	0	0	0	0	0	0	0	0	0	0	0	0	0	0	0	0	0	0	0	0	0	0	0	0	0	0	0	0	0	339341	0	0	0	0	0	0	0	0	0	0	0	0	0	0
142	r3 LAB	ind10	0	0	0	0	0	0	0	0	0	0	0	0	0	0	0	0	0	0	0	0	0	0	0	0	0	0	0	0	0	0	0	0	0	466882	0	0	0	0	0	0	0	0	0	0	0	0	0
143	r3 LAB	ind11	0	0	0	0	0	0	0	0	0	0	0	0	0	0	0	0	0	0	0	0	0	0	0	0	0	0	0	0	0	0	0	0	0	0	466826	0	0	0	0	0	0	0	0	0	0	0	0
144	r3 LAB	ind12	0	0	0	0	0	0	0	0	0	0	0	0	0	0	0	0	0	0	0	0	0	0	0	0	0	0	0	0	0	0	0	0	0	0	0	6.48016e+06	0	0	0	0	0	0	0	0	0	0	0
145	r1 VAo	ind1	9.25268	0	0	0	0	0	0	0	0	0	0	0	0	0	0	0	0	0	0	0	0	0	0	0	0	0	0	0	0	0	0	0	0	0	0	0	0	0	0	0	0	0	0	0	0	0	0
146	r1 VAo	ind2	0	204.717	0	0	0	0	0	0	0	0	0	0	0	0	0	0	0	0	0	0	0	0	0	0	0	0	0	0	0	0	0	0	0	0	0	0	0	0	0	0	0	0	0	0	0	0	0
147	r1 VAo	ind3	0	0	4963.39	0	0	0	0	0	0	0	0	0	0	0	0	0	0	0	0	0	0	0	0	0	0	0	0	0	0	0	0	0	0	0	0	0	0	0	0	0	0	0	0	0	0	0	0
148	r1 VAo	ind4	0	0	0	420.306	0	0	0	0	0	0	0	0	0	0	0	0	0	0	0	0	0	0	0	0	0	0	0	0	0	0	0	0	0	0	0	0	0	0	0	0	0	0	0	0	0	0	0
149	r1 VAo	ind5	0	0	0	0	521.02	0	0	0	0	0	0	0	0	0	0	0	0	0	0	0	0	0	0	0	0	0	0	0	0	0	0	0	0	0	0	0	0	0	0	0	0	0	0	0	0	0	0
150	r1 VAo	ind6	0	0	0	0	0	493.473	0	0	0	0	0	0	0	0	0	0	0	0	0	0	0	0	0	0	0	0	0	0	0	0	0	0	0	0	0	0	0	0	0	0	0	0	0	0	0	0	0
151	r1 VAo	ind7	0	0	0	0	0	0	16.0036	0	0	0	0	0	0	0	0	0	0	0	0	0	0	0	0	0	0	0	0	0	0	0	0	0	0	0	0	0	0	0	0	0	0	0	0	0	0	0	0
152	r1 VAo	ind8	0	0	0	0	0	0	0	383.979	0	0	0	0	0	0	0	0	0	0	0	0	0	0	0	0	0	0	0	0	0	0	0	0	0	0	0	0	0	0	0	0	0	0	0	0	0	0	0
153	r1 VAo	ind9	0	0	0	0	0	0	0	0	5624.41	0	0	0	0	0	0	0	0	0	0	0	0	0	0	0	0	0	0	0	0	0	0	0	0	0	0	0	0	0	0	0	0	0	0	0	0	0	0
154	r1 VAo	ind10	0	0	0	0	0	0	0	0	0	1006.91	0	0	0	0	0	0	0	0	0	0	0	0	0	0	0	0	0	0	0	0	0	0	0	0	0	0	0	0	0	0	0	0	0	0	0	0	0
155	r1 VAo	ind11	0	0	0	0	0	0	0	0	0	0	697.538	0	0	0	0	0	0	0	0	0	0	0	0	0	0	0	0	0	0	0	0	0	0	0	0	0	0	0	0	0	0	0	0	0	0	0	0
156	r1 VAo	ind12	0	0	0	0	0	0	0	0	0	0	0	10891.7	0	0	0	0	0	0	0	0	0	0	0	0	0	0	0	0	0	0	0	0	0	0	0	0	0	0	0	0	0	0	0	0	0	0	0
157	r2 VAo	ind1	0	0	0	0	0	0	0	0	0	0	0	0	0	0	0	0	0	0	0	0	0	0	0	0	0	0	0	0	0	0	0	0	0	0	0	0	0	0	0	0	0	0	0	0	0	0	0
158	r2 VAo	ind2	0	0	0	0	0	0	0	0	0	0	0	0	0	219.564	0	0	0	0	0	0	0	0	0	0	0	0	0	0	0	0	0	0	0	0	0	0	0	0	0	0	0	0	0	0	0	0	0
159	r2 VAo	ind3	0	0	0	0	0	0	0	0	0	0	0	0	0	0	31193.8	0	0	0	0	0	0	0	0	0	0	0	0	0	0	0	0	0	0	0	0	0	0	0	0	0	0	0	0	0	0	0	0
160	r2 VAo	ind4	0	0	0	0	0	0	0	0	0	0	0	0	0	0	0	57044.2	0	0	0	0	0	0	0	0	0	0	0	0	0	0	0	0	0	0	0	0	0	0	0	0	0	0	0	0	0	0	0
161	r2 VAo	ind5	0	0	0	0	0	0	0	0	0	0	0	0	0	0	0	0	36483.1	0	0	0	0	0	0	0	0	0	0	0	0	0	0	0	0	0	0	0	0	0	0	0	0	0	0	0	0	0	0
162	r2 VAo	ind6	0	0	0	0	0	0	0	0	0	0	0	0	0	0	0	0	0	365.751	0	0	0	0	0	0	0	0	0	0	0	0	0	0	0	0	0	0	0	0	0	0	0	0	0	0	0	0	0
163	r2 VAo	ind7	0	0	0	0	0	0	0	0	0	0	0	0	0	0	0	0	0	0	11527.2	0	0	0	0	0	0	0	0	0	0	0	0	0	0	0	0	0	0	0	0	0	0	0	0	0	0	0	0
164	r2 VAo	ind8	0	0	0	0	0	0	0	0	0	0	0	0	0	0	0	0	0	0	0	186025	0	0	0	0	0	0	0	0	0	0	0	0	0	0	0	0	0	0	0	0	0	0	0	0	0	0	0
165	r2 VAo	ind9	0	0	0	0	0	0	0	0	0	0	0	0	0	0	0	0	0	0	0	0	46198.4	0	0	0	0	0	0	0	0	0	0	0	0	0	0	0	0	0	0	0	0	0	0	0	0	0	0
166	r2 VAo	ind10	0	0	0	0	0	0	0	0	0	0	0	0	0	0	0	0	0	0	0	0	0	124621	0	0	0	0	0	0	0	0	0	0	0	0	0	0	0	0	0	0	0	0	0	0	0	0	0
167	r2 VAo	ind11	0	0	0	0	0	0	0	0	0	0	0	0	0	0	0	0	0	0	0	0	0	0	90773.2	0	0	0	0	0	0	0	0	0	0	0	0	0	0	0	0	0	0	0	0	0	0	0	0
168	r2 VAo	ind12	0	0	0	0	0	0	0	0	0	0	0	0	0	0	0	0	0	0	0	0	0	0	0	1.34106e+06	0	0	0	0	0	0	0	0	0	0	0	0	0	0	0	0	0	0	0	0	0	0	0
169	r3 VAo	ind1	0	0	0	0	0	0	0	0	0	0	0	0	0	0	0	0	0	0	0	0	0	0	0	0	0	0	0	0	0	0	0	0	0	0	0	0	0	0	0	0	0	0	0	0	0	0	0
170	r3 VAo	ind2	0	0	0	0	0	0	0	0	0	0	0	0	0	0	0	0	0	0	0	0	0	0	0	0	0	732.748	0	0	0	0	0	0	0	0	0	0	0	0	0	0	0	0	0	0	0	0	0
171	r3 VAo	ind3	0	0	0	0	0	0	0	0	0	0	0	0	0	0	0	0	0	0	0	0	0	0	0	0	0	0	288685	0	0	0	0	0	0	0	0	0	0	0	0	0	0	0	0	0	0	0	0
172	r3 VAo	ind4	0	0	0	0	0	0	0	0	0	0	0	0	0	0	0	0	0	0	0	0	0	0	0	0	0	0	0	274972	0	0	0	0	0	0	0	0	0	0	0	0	0	0	0	0	0	0	0
173	r3 VAo	ind5	0	0	0	0	0	0	0	0	0	0	0	0	0	0	0	0	0	0	0	0	0	0	0	0	0	0	0	0	206033	0	0	0	0	0	0	0	0	0	0	0	0	0	0	0	0	0	0
174	r3 VAo	ind6	0	0	0	0	0	0	0	0	0	0	0	0	0	0	0	0	0	0	0	0	0	0	0	0	0	0	0	0	0	538.165	0	0	0	0	0	0	0	0	0	0	0	0	0	0	0	0	0
175	r3 VAo	ind7	0	0	0	0	0	0	0	0	0	0	0	0	0	0	0	0	0	0	0	0	0	0	0	0	0	0	0	0	0	0	84798	0	0	0	0	0	0	0	0	0	0	0	0	0	0	0	0
176	r3 VAo	ind8	0	0	0	0	0	0	0	0	0	0	0	0	0	0	0	0	0	0	0	0	0	0	0	0	0	0	0	0	0	0	0	834629	0	0	0	0	0	0	0	0	0	0	0	0	0	0	0
177	r3 VAo	ind9	0	0	0	0	0	0	0	0	0	0	0	0	0	0	0	0	0	0	0	0	0	0	0	0	0	0	0	0	0	0	0	0	238838	0	0	0	0	0	0	0	0	0	0	0	0	0	0
178	r3 VAo	ind10	0	0	0	0	0	0	0	0	0	0	0	0	0	0	0	0	0	0	0	0	0	0	0	0	0	0	0	0	0	0	0	0	0	575479	0	0	0	0	0	0	0	0	0	0	0	0	0
179	r3 VAo	ind11	0	0	0	0	0	0	0	0	0	0	0	0	0	0	0	0	0	0	0	0	0	0	0	0	0	0	0	0	0	0	0	0	0	0	359135	0	0	0	0	0	0	0	0	0	0	0	0
180	r3 VAo	ind12	0	0	0	0	0	0	0	0	0	0	0	0	0	0	0	0	0	0	0	0	0	0	0	0	0	0	0	0	0	0	0	0	0	0	0	5.20284e+06	0	0	0	0	0	0	0	0	0	0	0
	v1		0	0	0	0	0	0	0	0	0	0	0	0	0	0	0	0	0	0	0	0	0	0	0	0	0	0	0	0	0	0	0	0	0	0	0	0	37090	0	2.49953e+06	0	1.2008e+07	0	0	0	0	0	0
	dif		1.11074e-05	0.000203794	0.00153559	0.000219381	0.000133976	0.000326404	1.00669e-05	0.000268187	0.000470133	7.82181e-05	5.71198e-05	0.00182294	0	0.000751363	0.118251	0.328771	0.104416	0.00379455	0.0988914	0.798577	0.309612	0.505812	0.469531	6.49717	0	0.000495842	0.120257	0.328991	0.10455	0.00174347	0.106211	0.793913	0.310082	0.50589	0.469588	6.49899	0.000377159		1.35067		1.35105		0	0	0.00132424	0.000180327	0.000133408
			max V	0
			min U	0
			min FD	0
[truncated: 33 more columns]
